# Supplementary material
Source: PubMed Central journal article supplement (PMC10873520)
Supplement: glac046_suppl_supplementary_material.pdf [file glac046_suppl_supplementary_material.pdf]

## **SUPPLEMENTARY MATERIAL**

### **Supplementary Tables**

**Supplementary Table 1. Genomic control ( $\lambda$ ) of GWAS and CMA for pulmonary function and age-related traits**

**Supplementary Table 2. Tetrachoric correlations of CMA for pulmonary function and age-related traits**

**Supplementary Table 3. Significant associated variants for sex-combined analyses (xlsx)**

**Supplementary Table 4. NHGRI-EBI GWAS Catalog for sex-combined associated variants (xlsx)**

**Supplementary Table 5. Significant associated variants for sex-specific analyses (xlsx)**

**Supplementary Table 6. T-Test for significant sex-specific associated variants from GWAS traits (xlsx)**

**Supplementary Table 7. NHGRI-EBI GWAS Catalog for sex-specific associated variants (xlsx)**

**Supplementary Table 8. Regulatory features for sex-combined associated variants (xlsx)**

**Supplementary Table 9. Regulatory features for sex-specific associated variants (xlsx)**

**Supplementary Table 10. Summary of associated SNP and their SNPs at high LD (docx)**

**Supplementary Table 11. GWAS4D regulatory features for CMA SNPs (xlsx)**

**Supplementary Table 12. Genes for regulatory binding affinity changes related to identified CMA genes/locus (docx)**

## Supplementary Figures

**Supplementary Figure 1. GWAS quantile-quantile plots of observed versus expected  $-\log_{10}$  ( $P$ -value)**

**Supplementary Figure 2. Manhattan plots of GWAS for pulmonary function and age-related traits**

**Supplementary Figure 3. Manhattan plot of CMA for pulmonary function and age-related traits**

**Supplementary Figure 4. Locuszoom plots of novel CMA for sex-combined associated variants**

**Supplementary Figure 5. Locuszoom plots of novel CMA for sex-specific associated variants**

**Supplementary Figure 6. GWAS4D regulatory features of rs77980484 (8q24.12) on T-cells from peripheral blood**

**Supplementary Figure 7. GWAS4D regulatory features of rs11079574 (17q23-q24.1) on T-cells from peripheral blood**

**Supplementary Figure 8. GWAS4D regulatory features of rs62196354 (20q13.33) on fetal lung cell lines**

**Supplementary Figure 9. GWAS4D regulatory features of rs117500377 (14q12) on adipose mesenchymal stem cells**

**Supplementary Figure 10. GWAS4D regulatory features of rs117500377 (14q12) on liver**

**Supplementary Figure 11. GWAS4D regulatory features of rs62196354 (20q13.33) on hepatocellular carcinoma cell line**

**Supplementary Table 1. Genomic control ( $\lambda$ ) of GWAS and CMA for pulmonary function and age-related traits**

|                 | <b>FEV1</b> | <b>FVC</b> | <b>IL-6</b> | <b>hsCRP</b> | <b>BMI</b> | <b>Grip strength</b> | <b>HbA1c</b> | <b>Fasting glucose</b> |
|-----------------|-------------|------------|-------------|--------------|------------|----------------------|--------------|------------------------|
| <b>CMA</b>      | 1.005       | 0.996      | 1.023       | 1.011        | 1.023      | 1.055                | 1.012        | 1.005                  |
| <b>GWAS</b>     |             |            |             |              |            |                      |              |                        |
| FEV1_IL-6_hsCRP | 1.094       |            |             |              |            |                      |              |                        |
| FVC_IL-6_hsCRP  |             | 1.095      |             |              |            |                      |              |                        |
| FEV1_BMI        | 1.028       |            |             |              |            |                      |              |                        |
| FVC_BMI         |             | 1.034      |             |              |            |                      |              |                        |
| FEV1_Grip       | 1.056       |            |             |              |            |                      |              |                        |
| FVC_Grip        |             | 1.048      |             |              |            |                      |              |                        |
| FEV1_HbA1c      | 1.020       |            |             |              |            |                      |              |                        |
| FVC_HbA1c       |             | 1.021      |             |              |            |                      |              |                        |
| FEV1_Glucose    | 1.002       |            |             |              |            |                      |              |                        |
| FVC_Glucose     |             | 1.003      |             |              |            |                      |              |                        |

FEV1 = Forced expiratory volume in 1 second, FVC = Forced vital capacity, IL-6 = Interleukin-6; hsCRP = High-sensitivity C-reactive protein; BMI = Body mass index; Glucose = Fasting plasma glucose; Grip = Muscle (grip) strength; HbA1c = Hemoglobin A1c.

**Supplementary Table 2. Tetrachoric correlations of CMA for pulmonary function and age-related traits**

| <b>Age-related traits</b>     | <b>FEV1</b> | <b>FVC</b> |
|-------------------------------|-------------|------------|
| <b>IL-6</b>                   | 0.012       | 0.016      |
| <b>hsCRP</b>                  | 0.021       | 0.036      |
| <b>IL-6 _ hsCRP</b>           | 0.136       | 0.136      |
| <b>BMI</b>                    | 0.009       | 0.026      |
| <b>Muscle (Grip) strength</b> | 0.013       | 0.016      |
| <b>HbA1c</b>                  | 0.009       | 0.014      |
| <b>Glucose</b>                | 0.000       | 0.002      |

FEV1 = Forced expiratory volume in 1 second, FVC = Forced vital capacity, IL-6 = Interleukin-6; hsCRP = High-sensitivity C-reactive protein; BMI = Body mass index; Glucose = Fasting plasma glucose; Grip = Muscle (grip) strength; HbA1c = Hemoglobin A1c.

**Supplementary Figure 1. GWAS Q-Q plots of observed versus expected  $-\log_{10}$  ( $P$ -value) for pulmonary function and age-related traits**

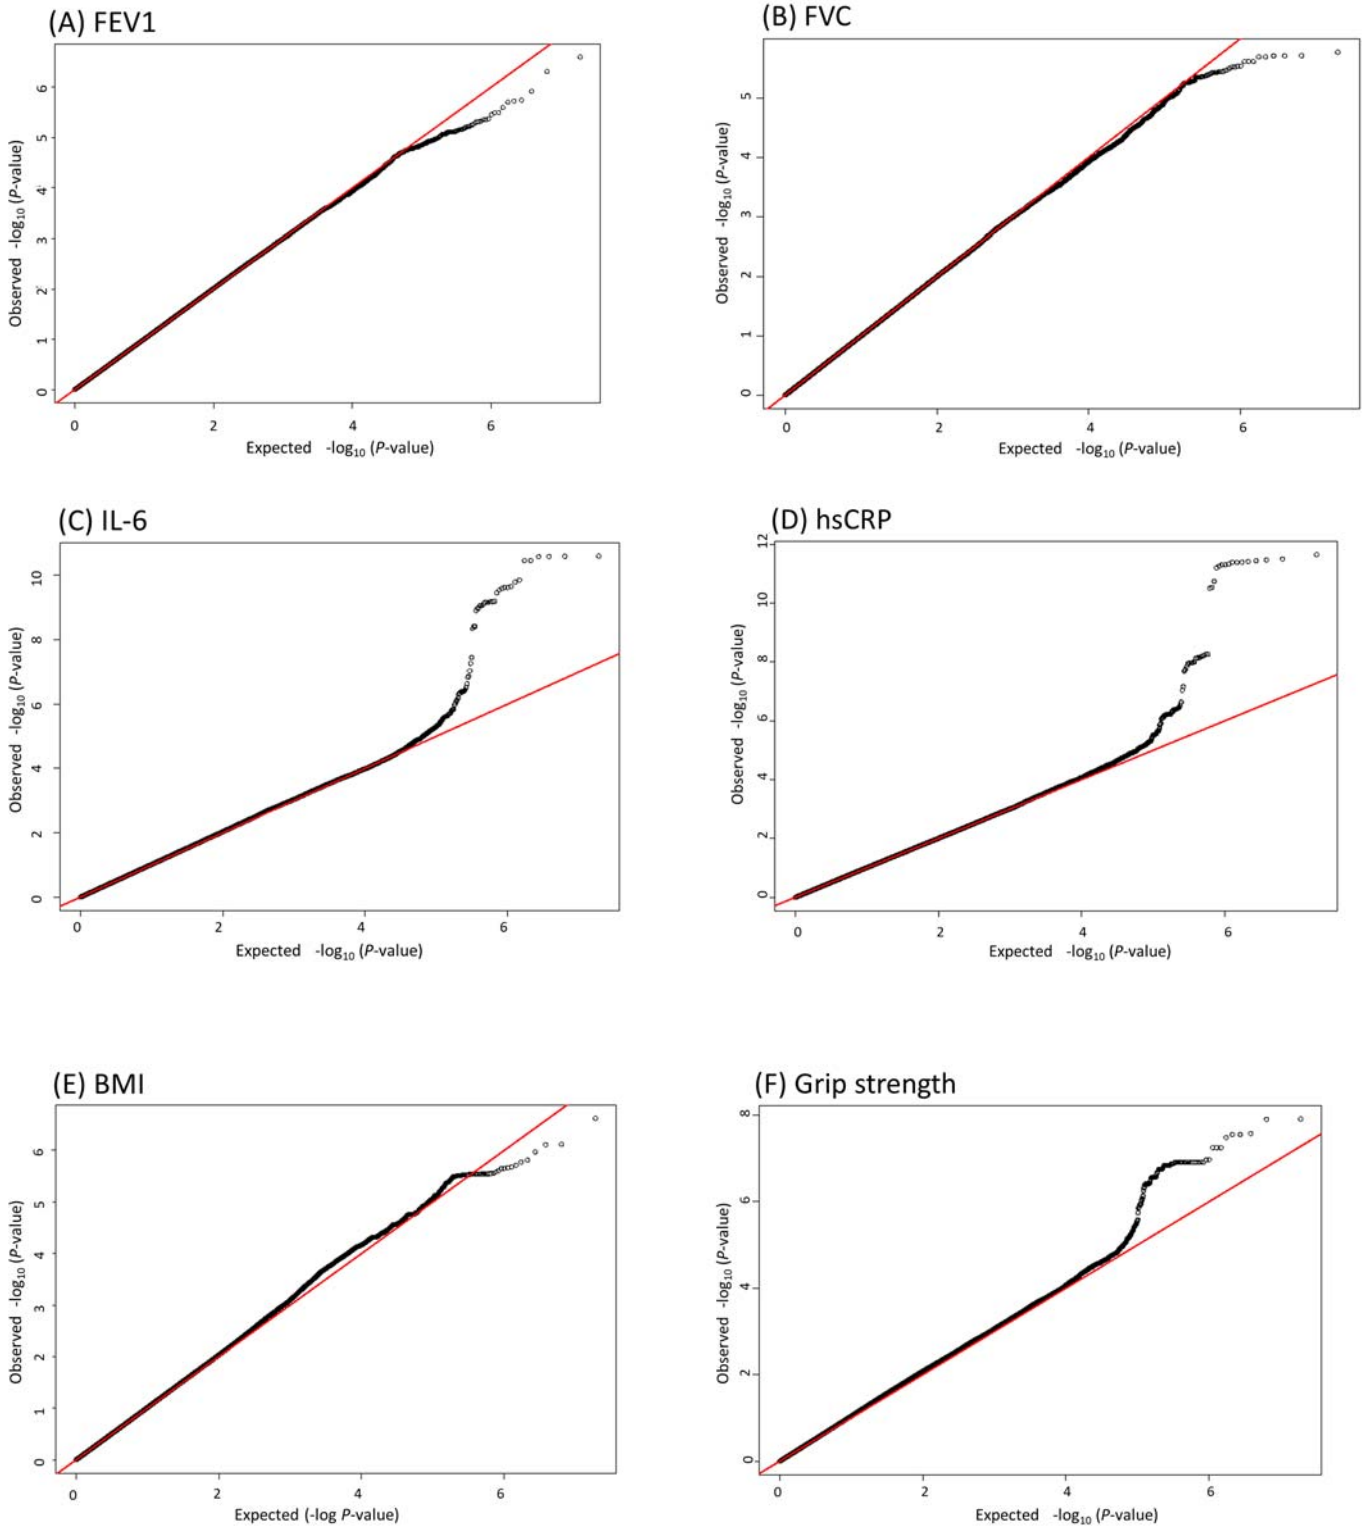

Supplementary Figure 1 (cont.)

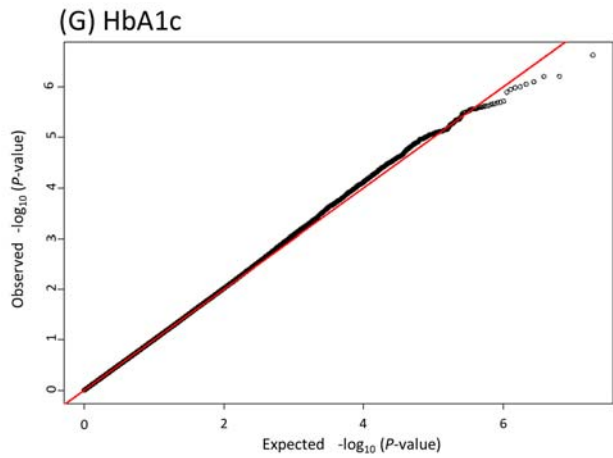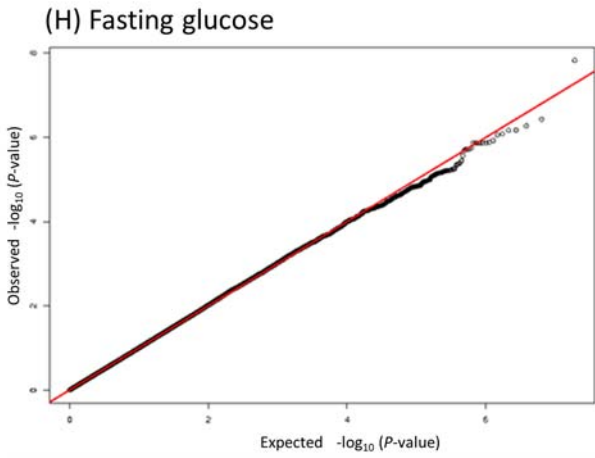

**Supplementary Figure 2. Manhattan plots of GWAS for pulmonary function and age-related**

**(A) FEV1**

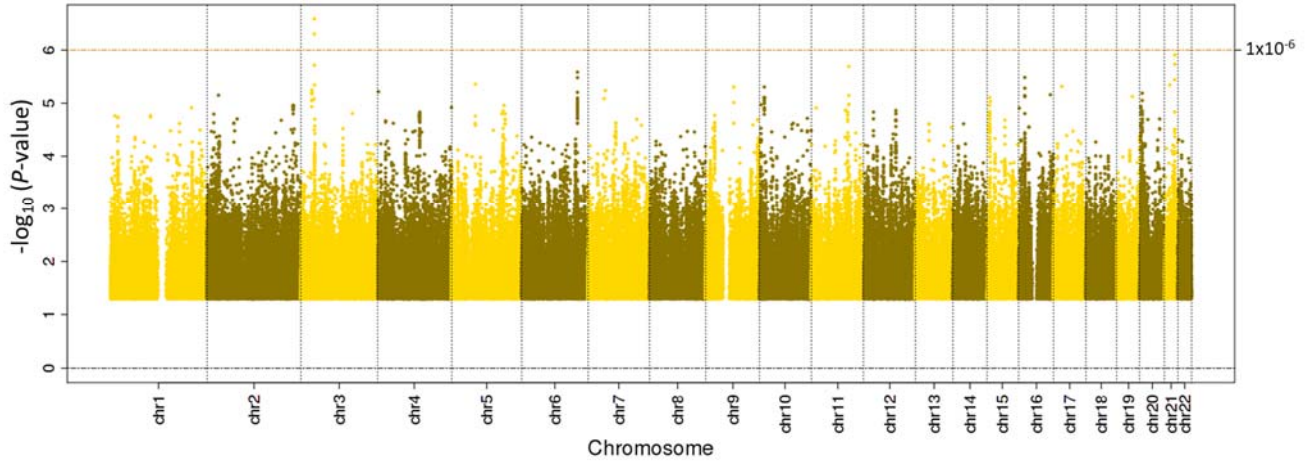

**(B) FVC**

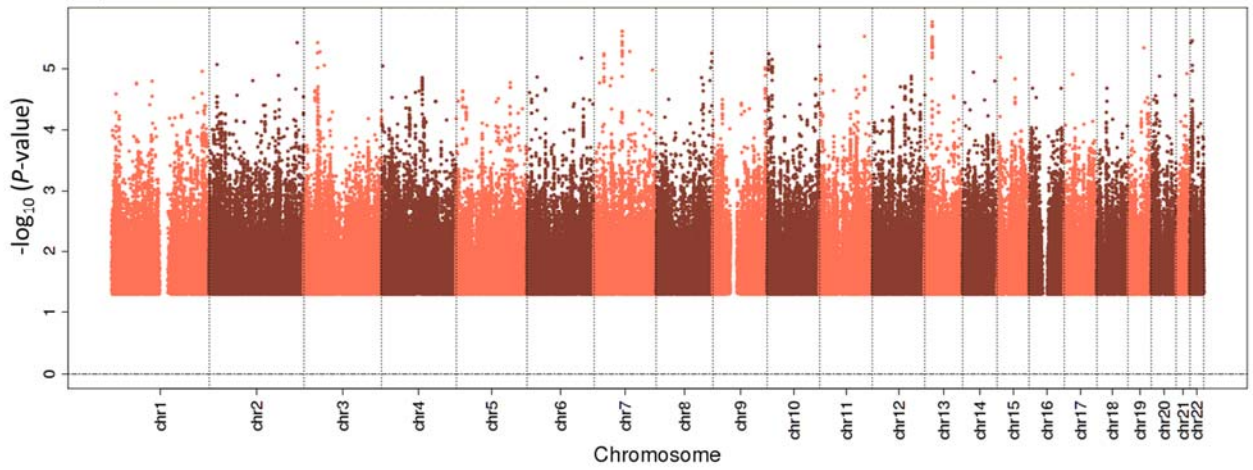

**(C) IL-6**

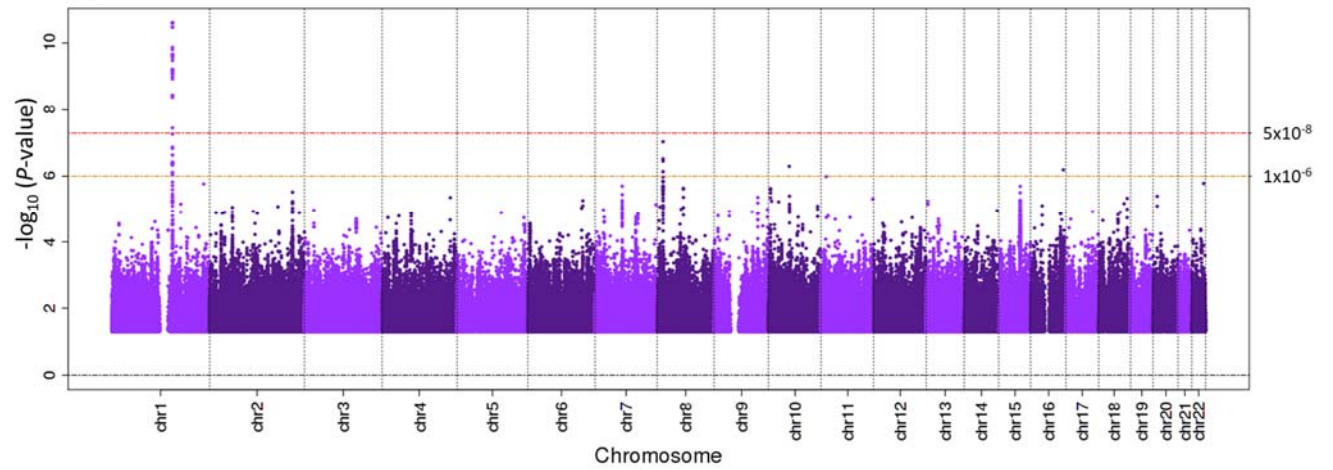



### Supplementary Figure 2 (cont.)

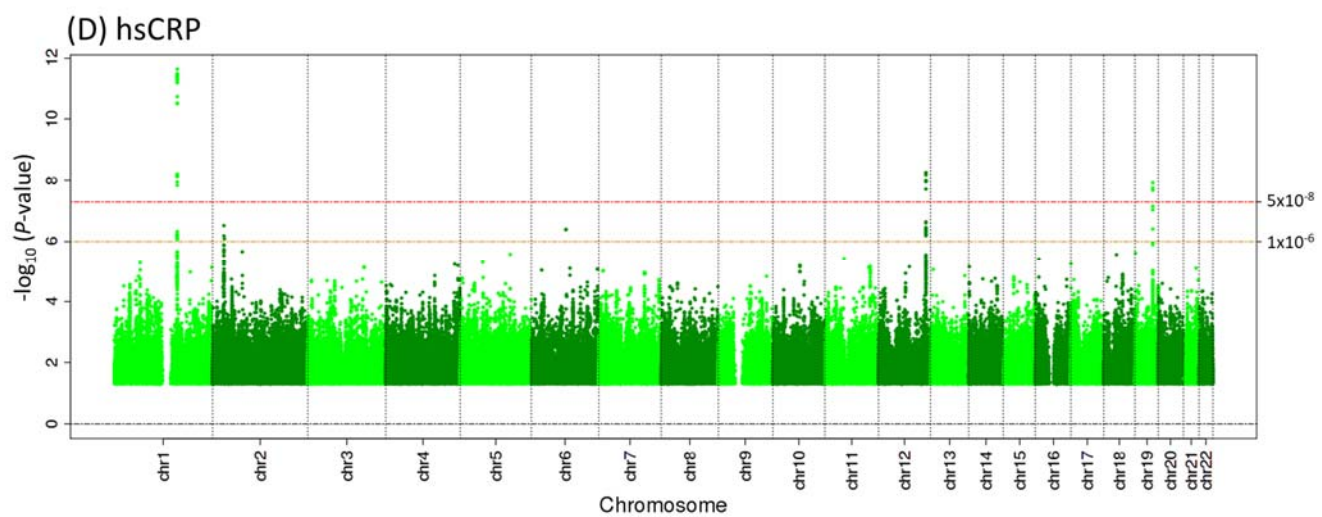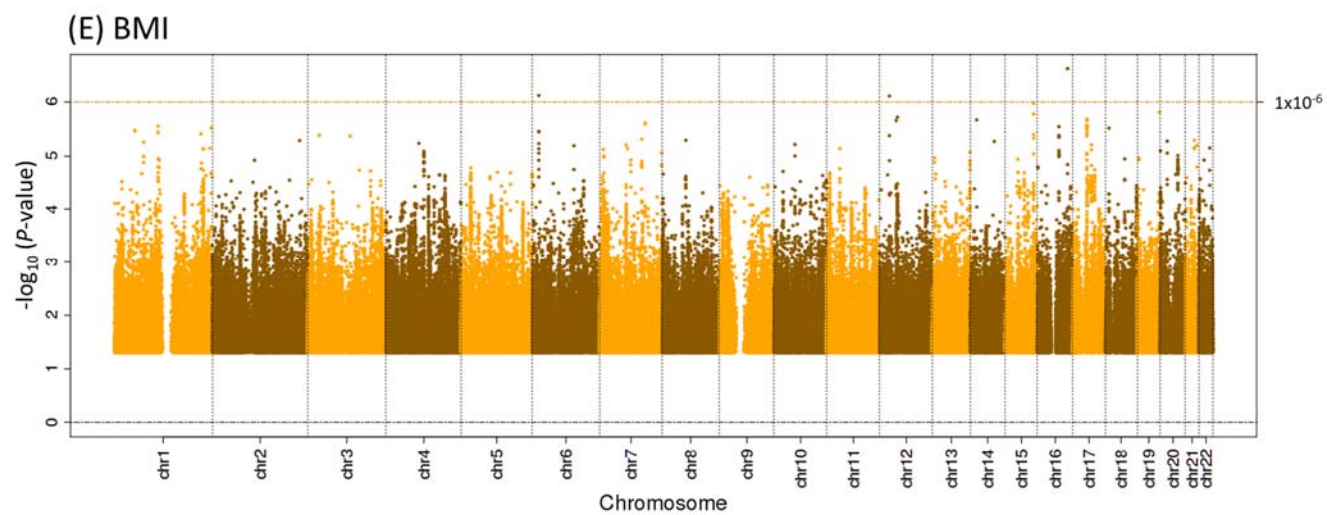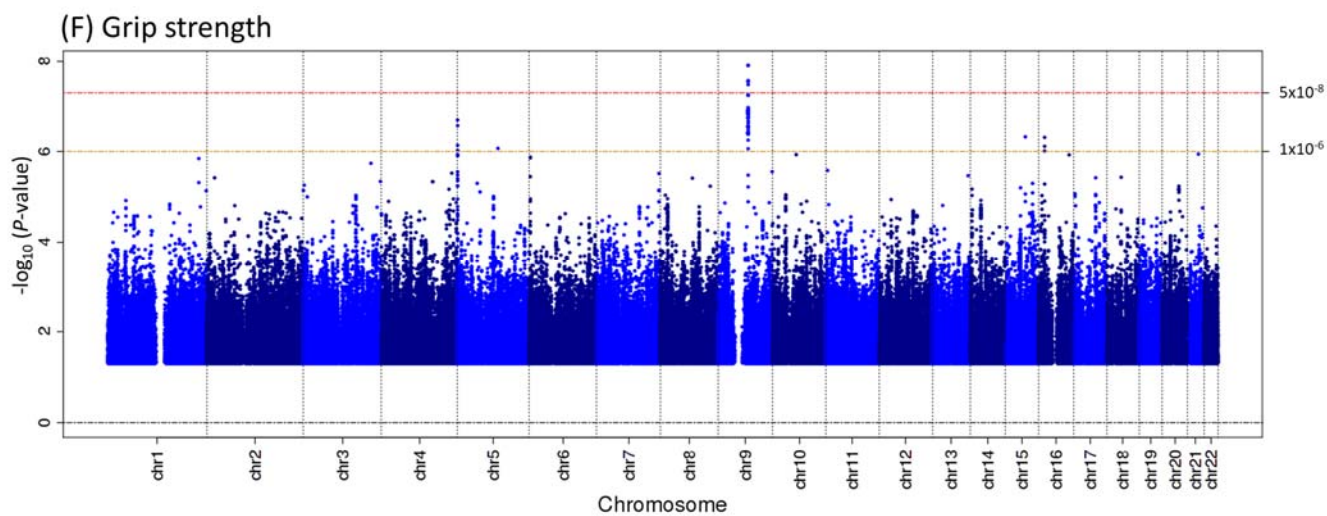

## Supplementary Figure 2 (cont.)

(G) HbA1c

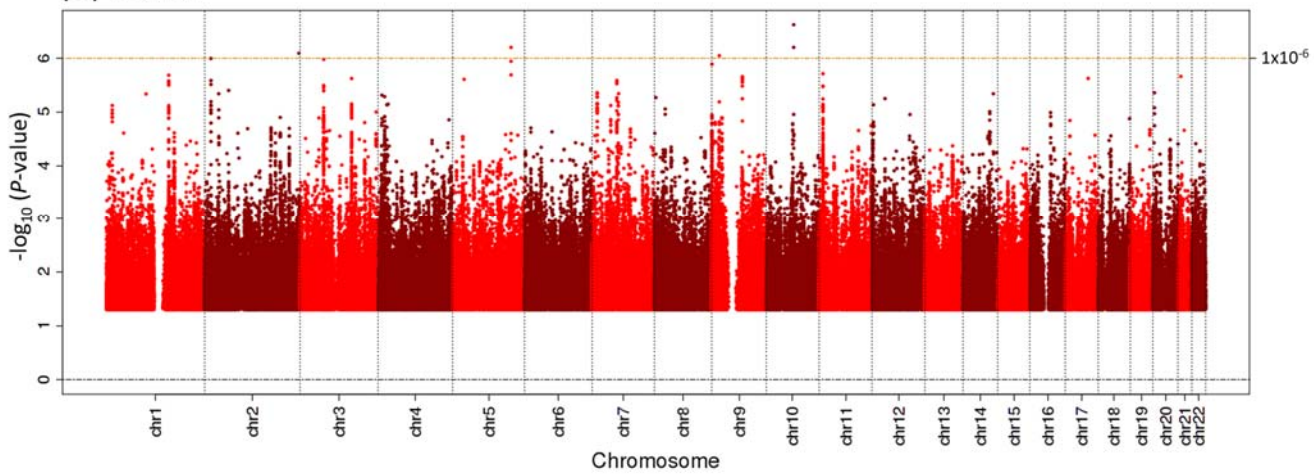

(H) Fasting glucose

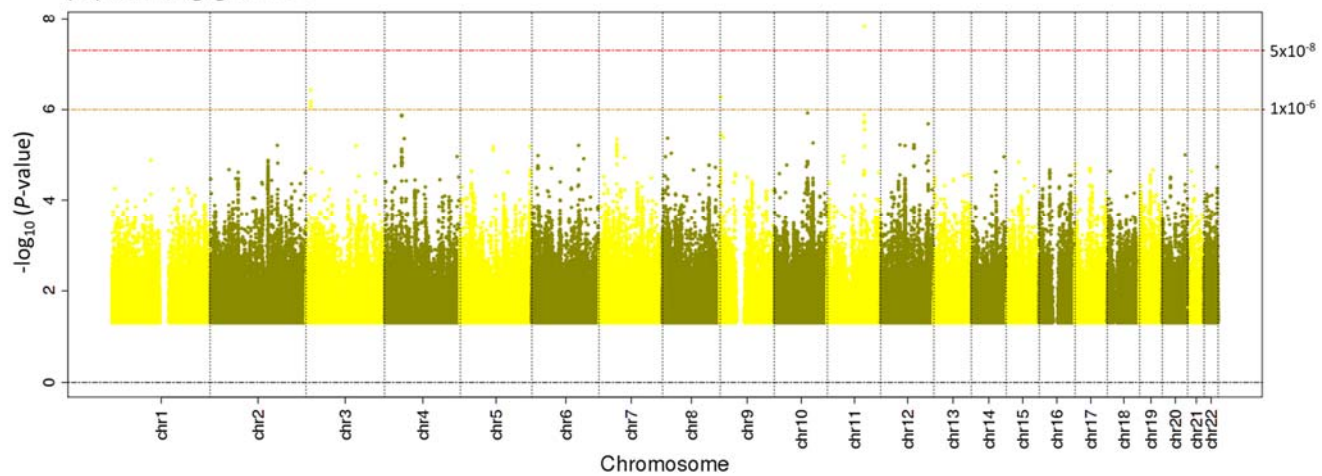



**Supplementary Figure 3. Manhattan plot of CMA for pulmonary function and age-related traits**

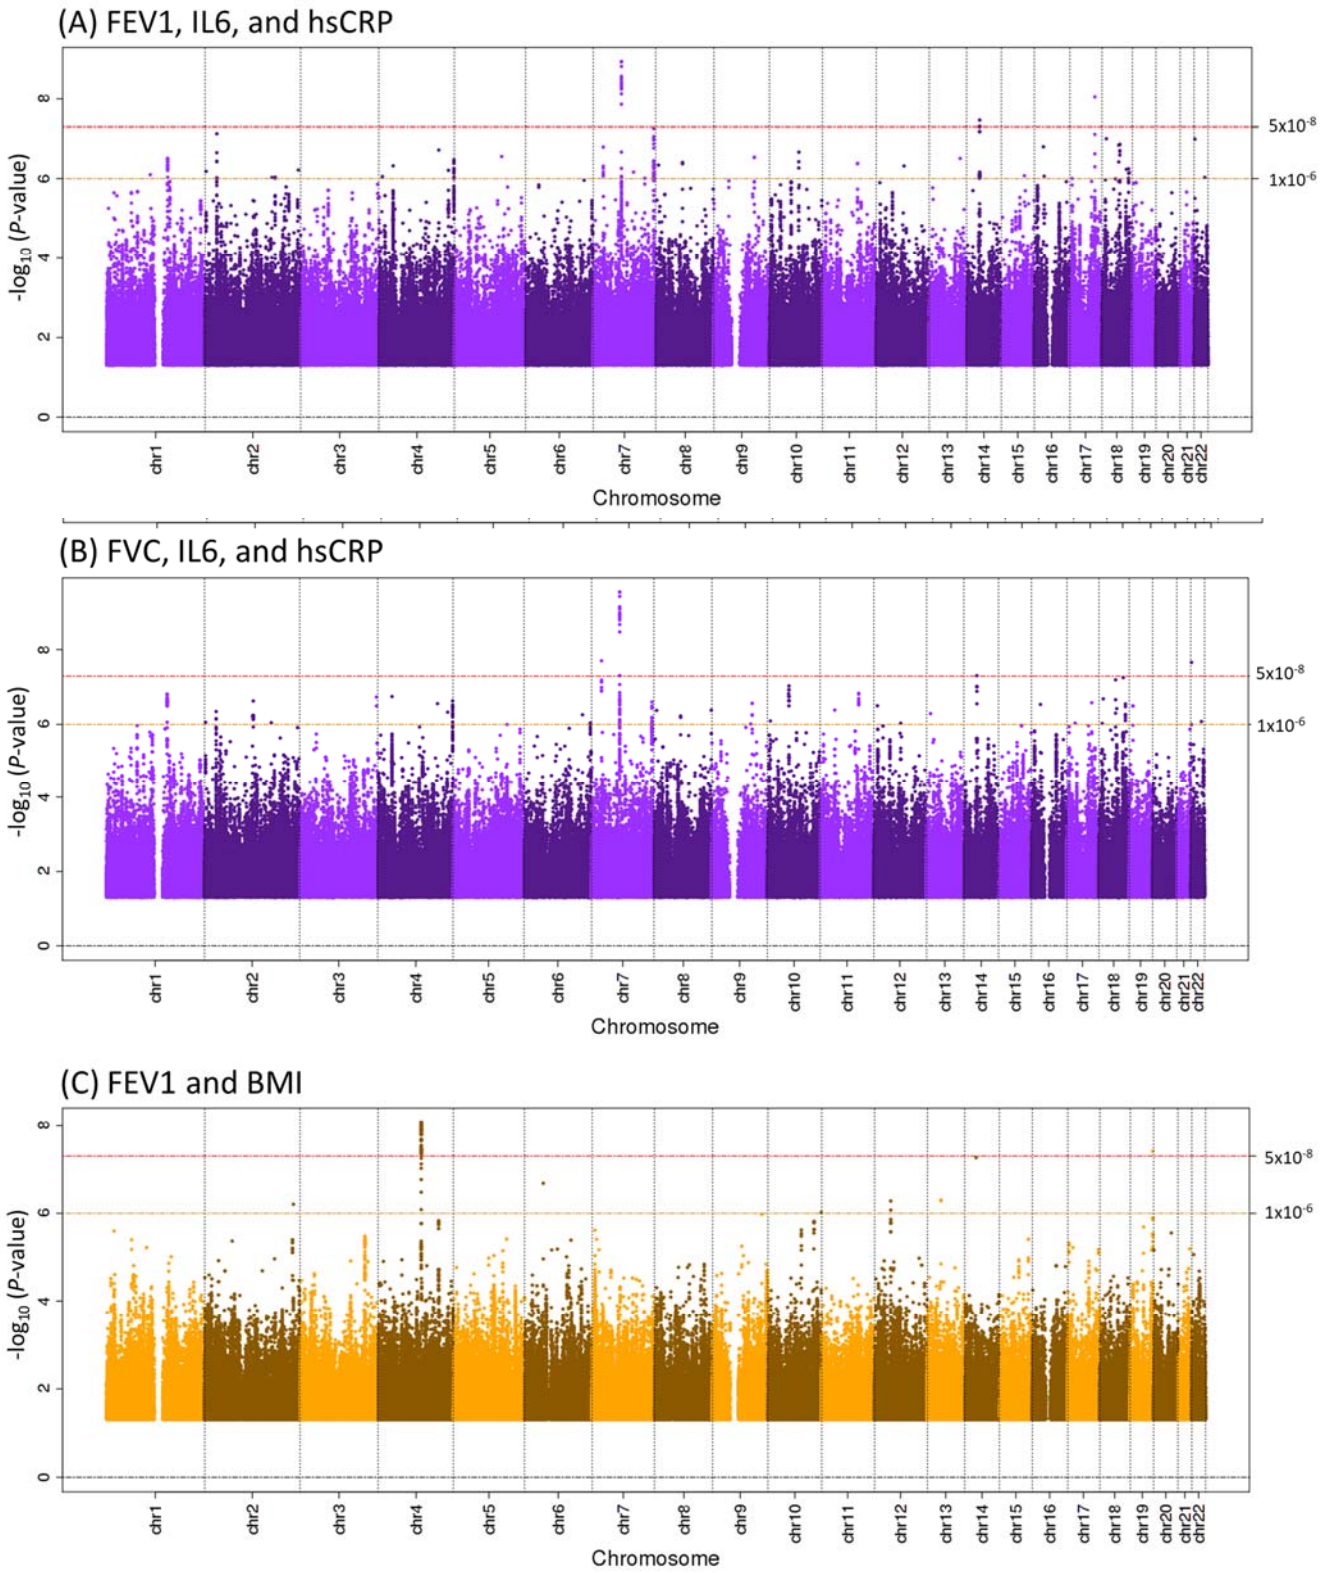

Supplementary Figure 3 (cont.)

(D) FVC and BMI

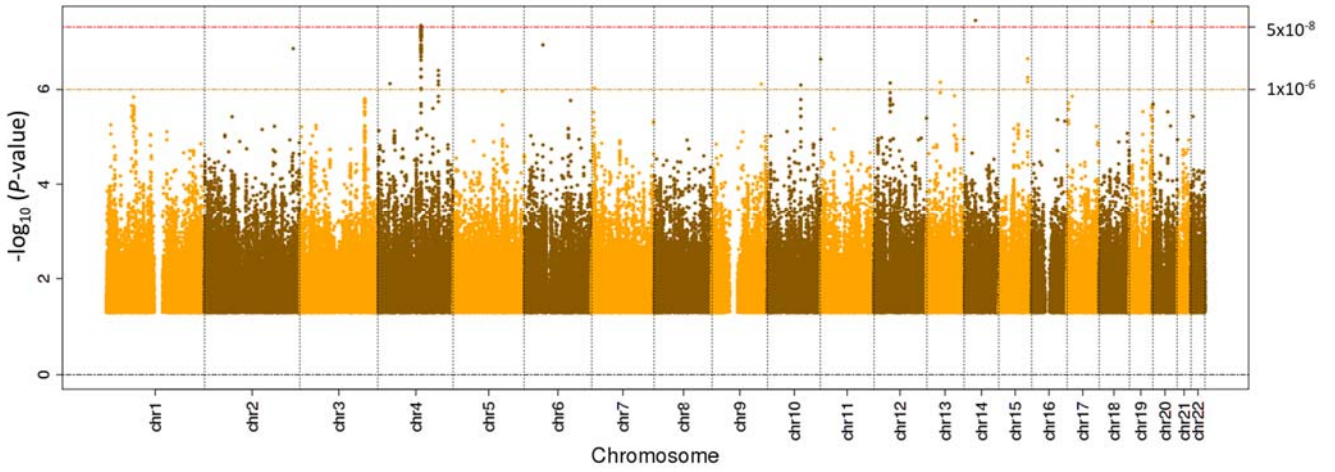

(E) FEV1 and grip strength

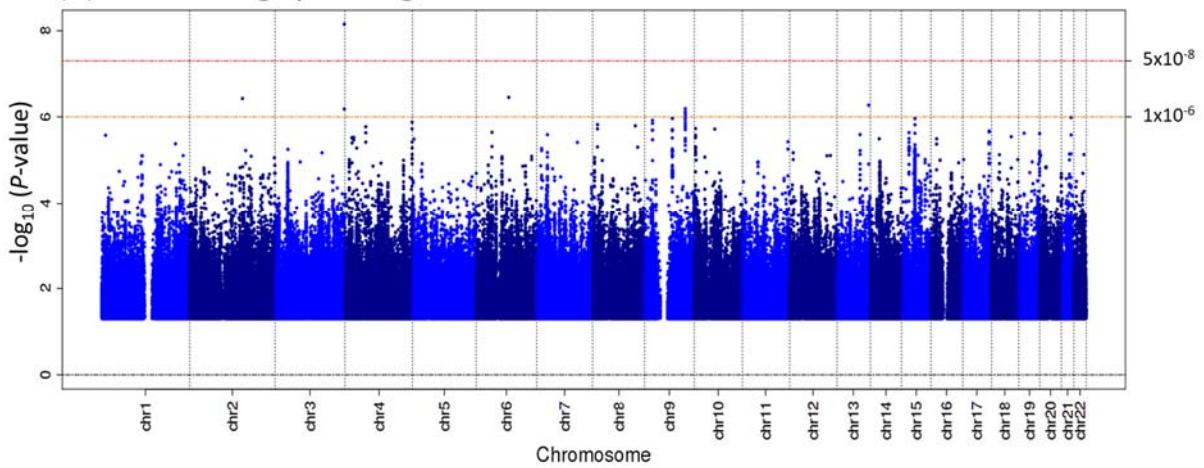

(F) FVC and grip strength

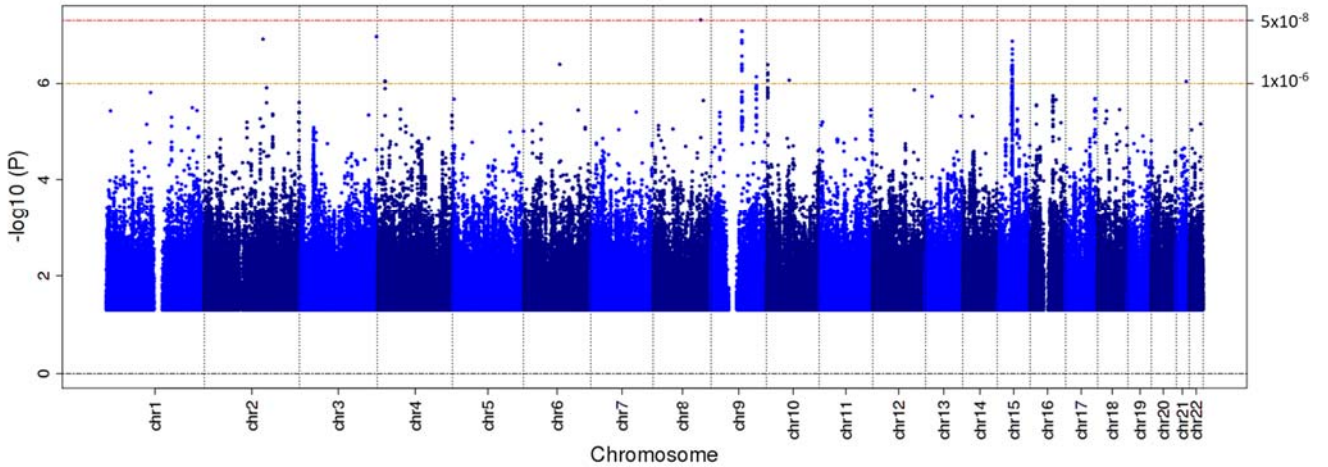

Supplementary Figure 3 (cont.)

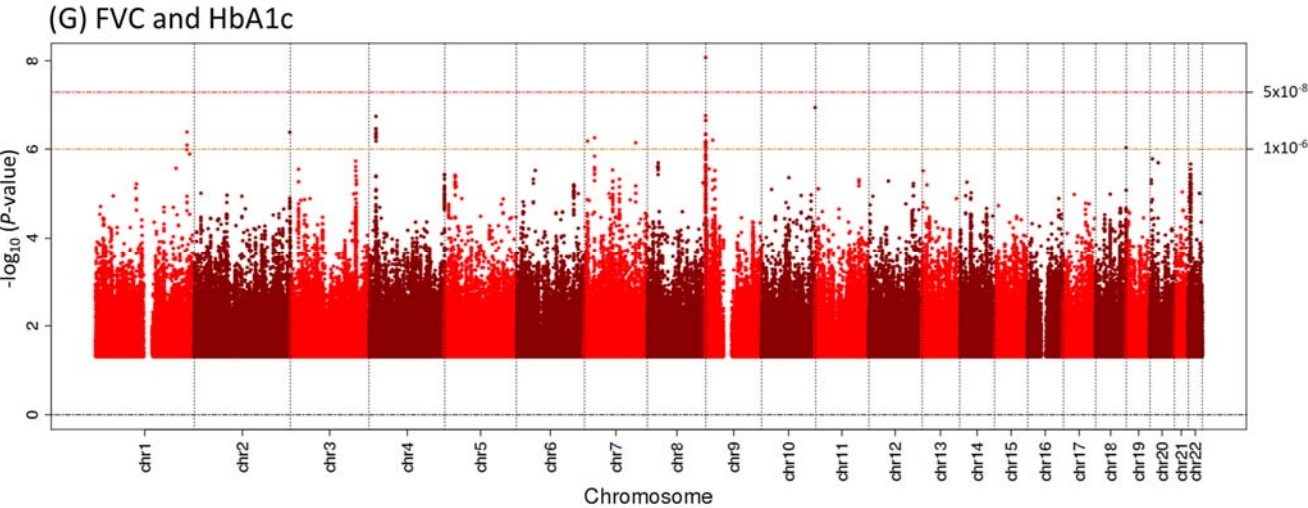



**Supplementary Figure 4. Locuszoom plots of CMA for sex-combined associated variants with pulmonary function and inflammatory markers (A, B, C, D, E, F, G, H), BMI (I, J, K, L, M, N), grip strength (O, P), and HbA1c (Q)**

(A) FVC\_IL6\_hsCRP: rs67112407

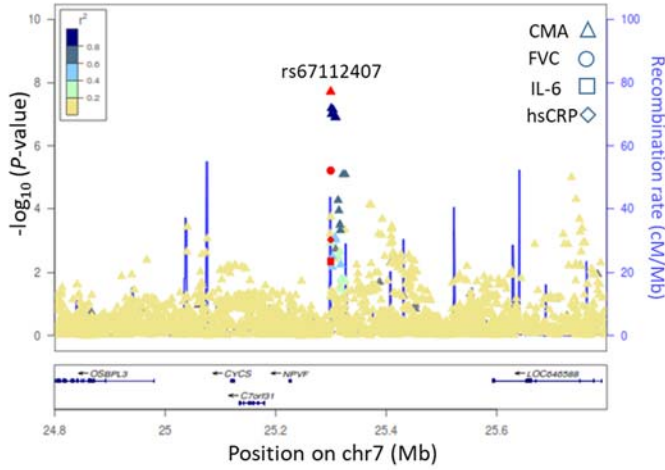

(B) FEV1\_IL-6\_hsCRP: rs17349645

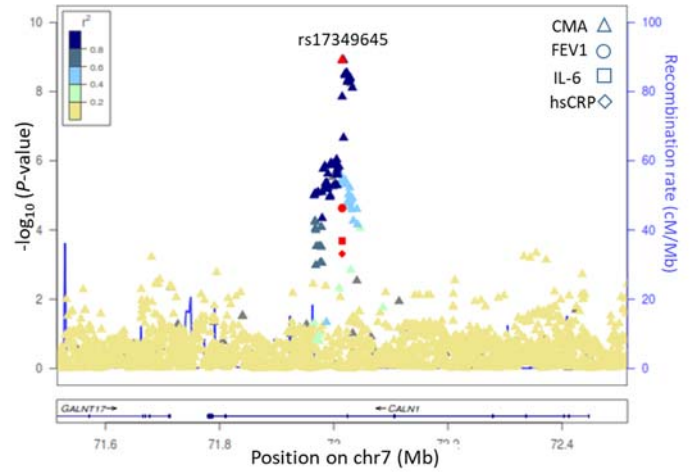

(C) FVC\_IL-6\_hsCRP: rs17349645

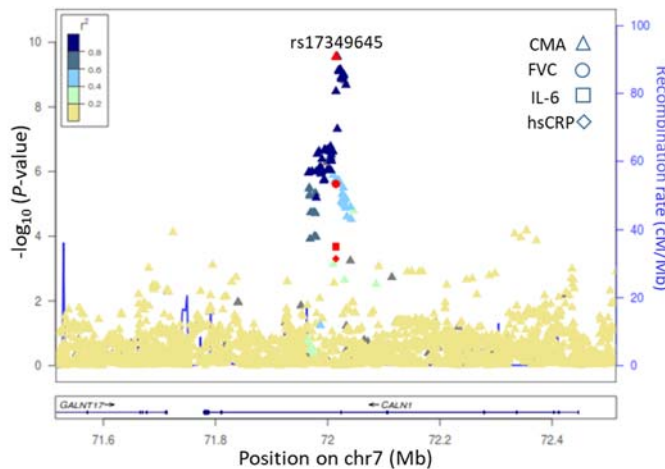

(D) FEV1\_IL-6\_hsCRP: rs34171875

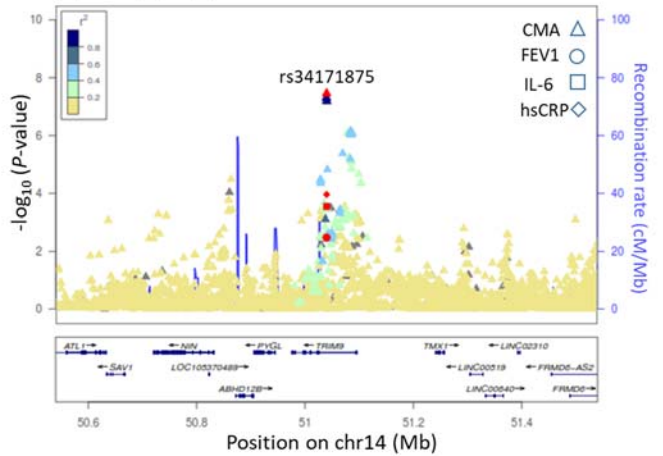

(E) FVC\_IL-6\_hsCRP: rs34171875

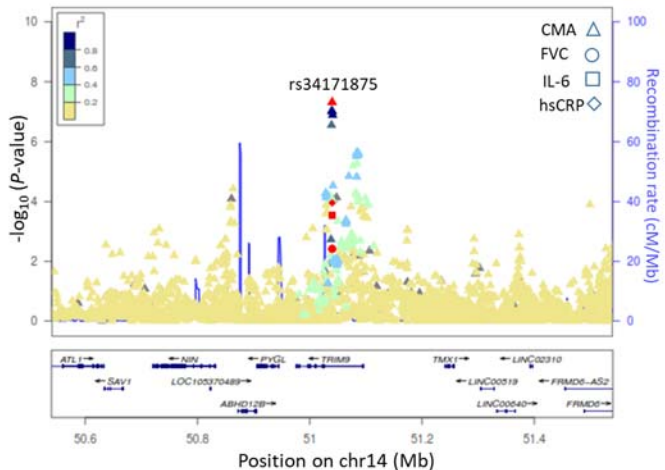

(F) FEV1\_IL-6\_hsCRP: rs11079574

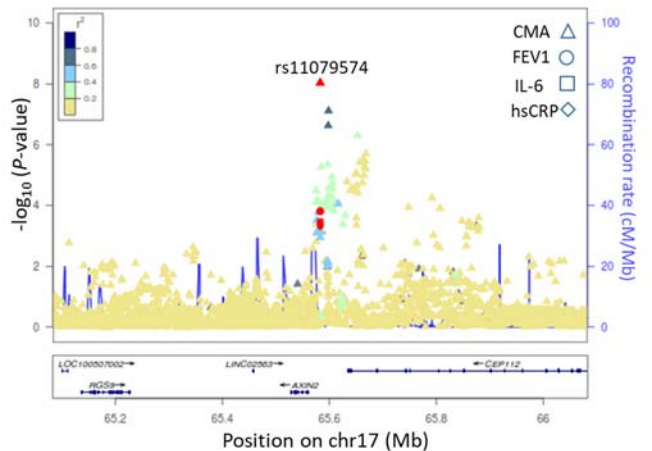

(G) FVC\_IL-6\_hsCRP: rs2896013

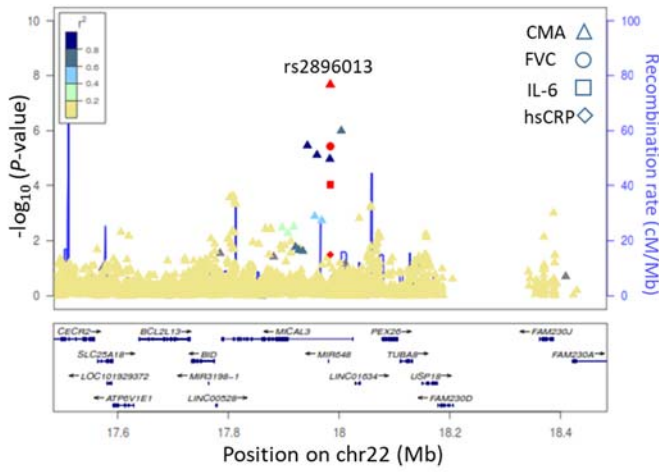

(H) FEV1\_hsCRP: rs8044418

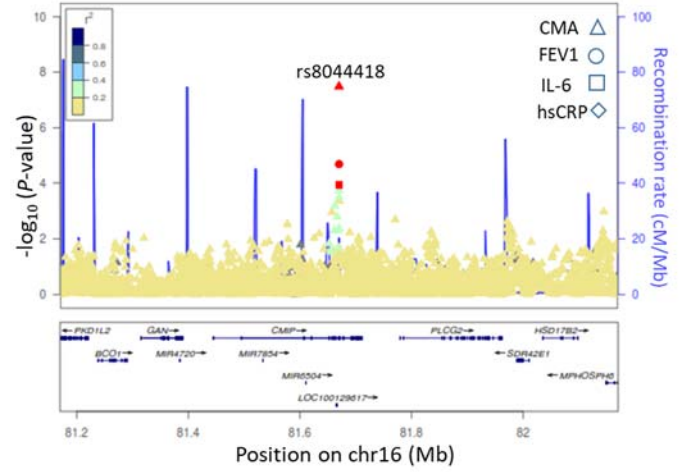

(I) FEV1\_BMI: rs1493126

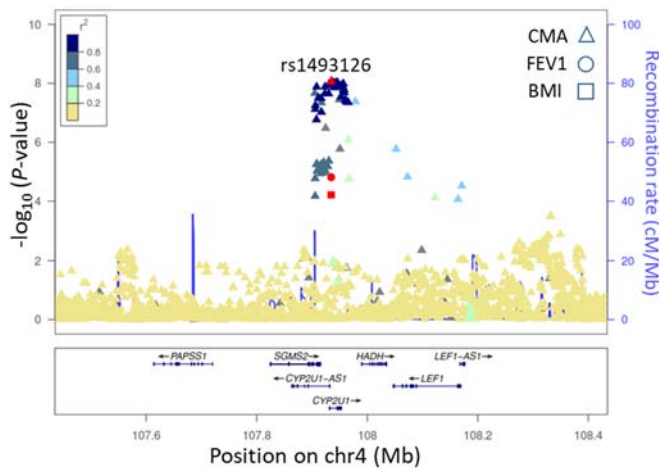

(J) FVC\_BMI: rs1493126

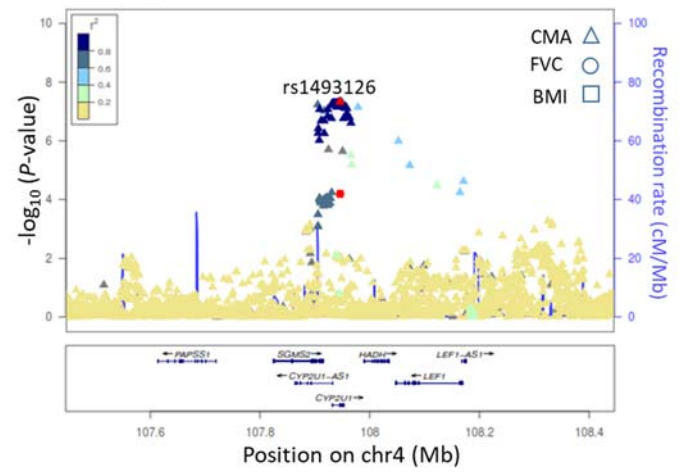

(K) FEV1\_BMI: rs144725076

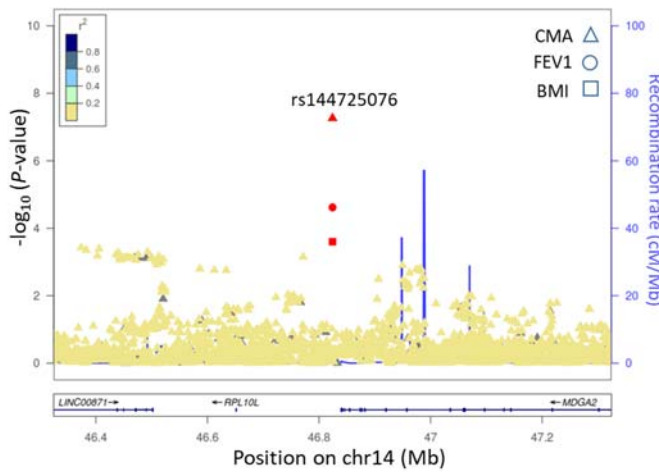

(L) FVC\_BMI: rs144725076

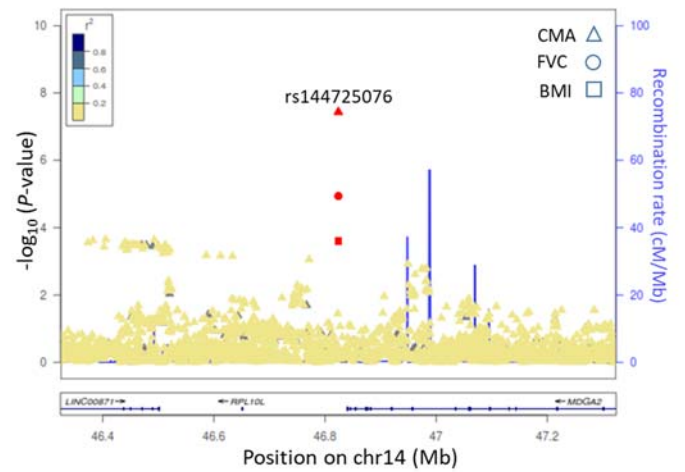

(M) FEV1\_BMI: rs7256661

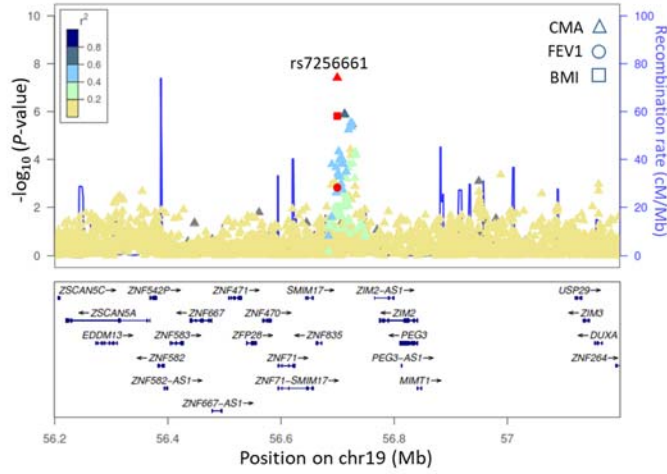

(N) FVC\_BMI: rs7256661

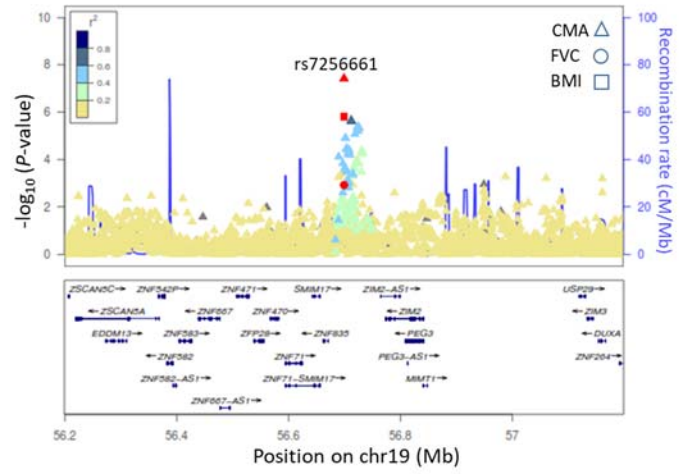

(O) FEV1\_Grip strength: rs9870813

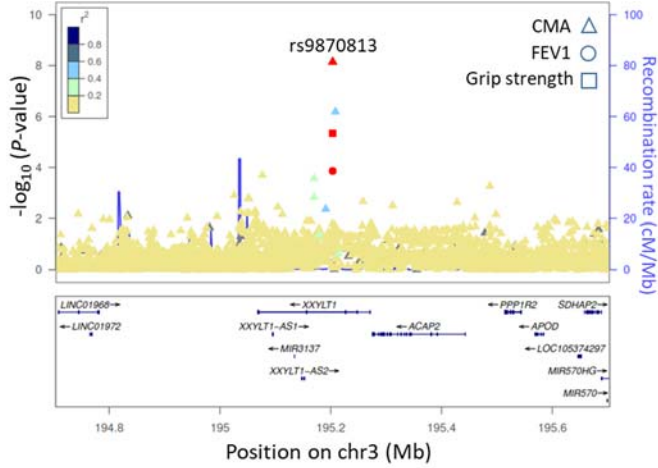

(P) FVC\_Grip strength: rs77980484

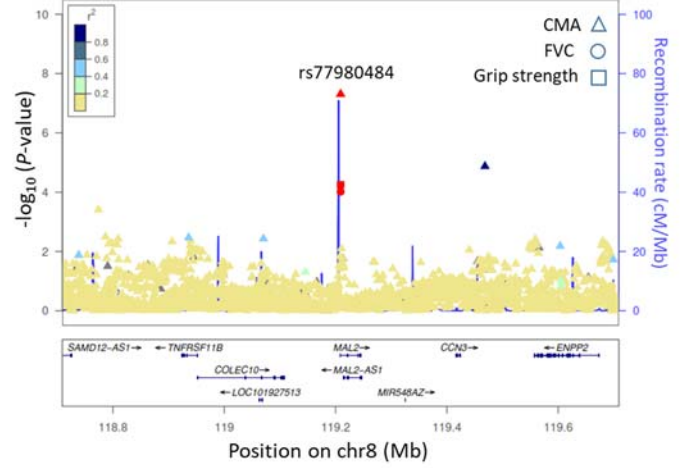

(Q) FVC\_HbA1c: rs201917736

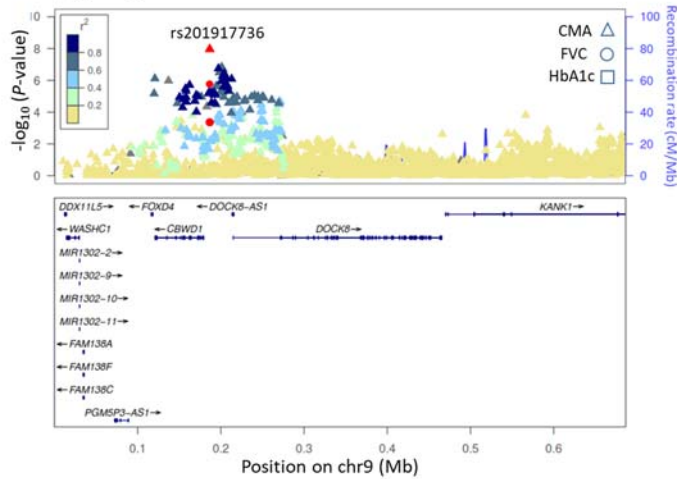



**Supplementary Figure 5. Locuszoom plots of CMA for sex-specific associated variants between pulmonary function and inflammatory markers (Men: M1 – M12, Women: W1 – W11), BMI (Men: M13 – M14), grip strength (Women: W12 – W14), and HbA1c (Women: W15)**

(M1) Men FVC\_IL6\_hsCRP: rs76268042

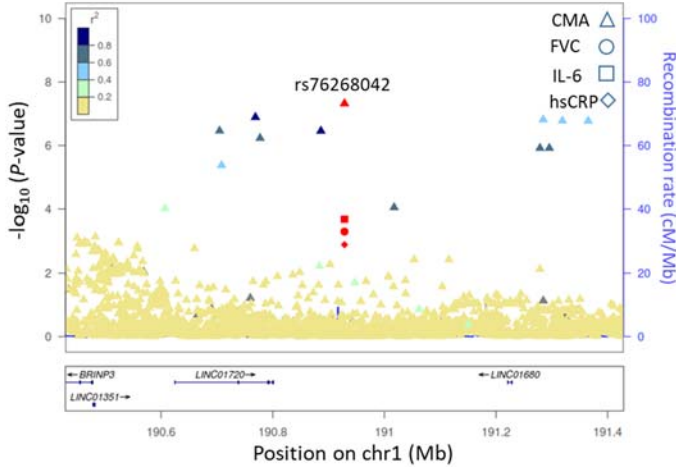

(M2) Men FEV1\_IL6\_hsCRP: rs539460509

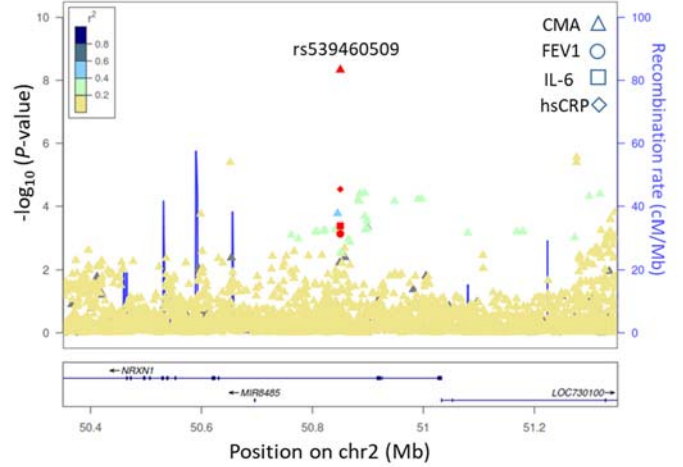

(M3) Men FVC\_IL6\_hsCRP: rs539460509

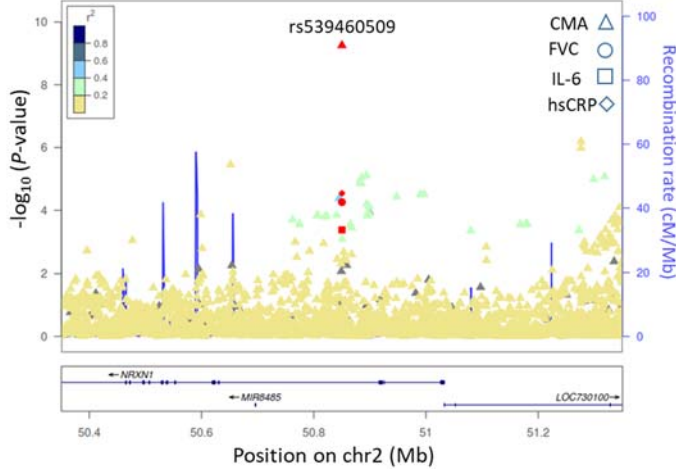

(M4) Men FVC\_IL6\_hsCRP: rs73170189

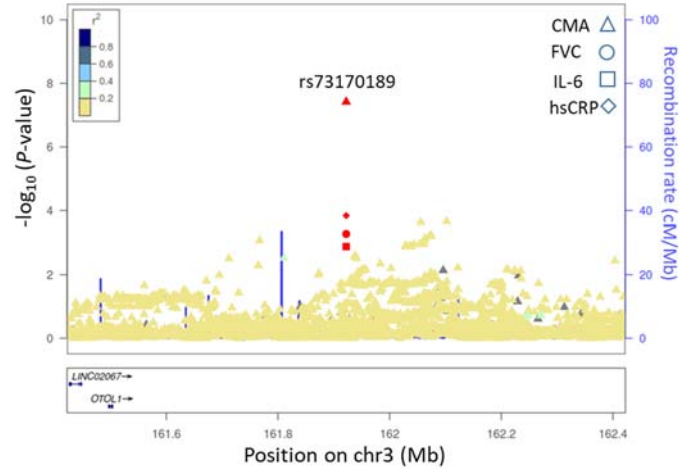

(M5) Men FVC\_IL6\_hsCRP: rs62329654

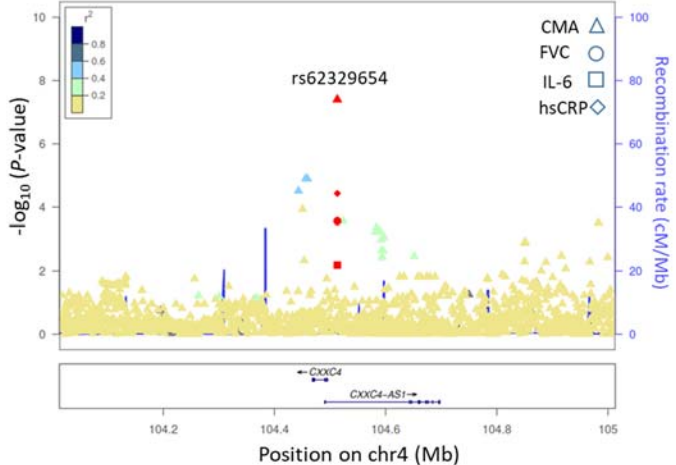

(M6) Men FVC\_IL6\_hsCRP: rs594747

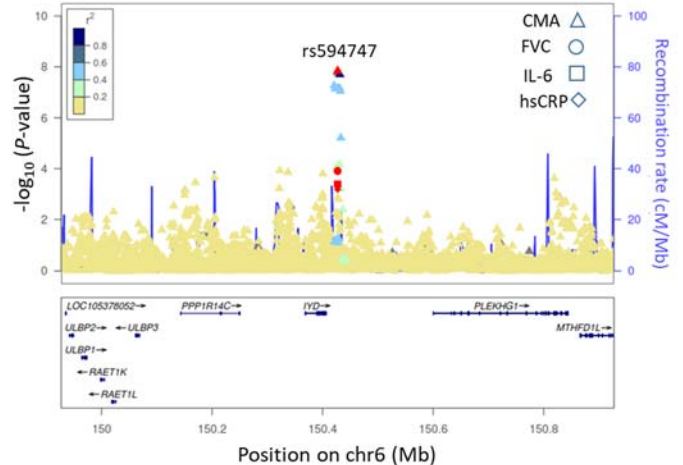

(M7) Men FEV1\_IL6\_hsCRP: rs12788025

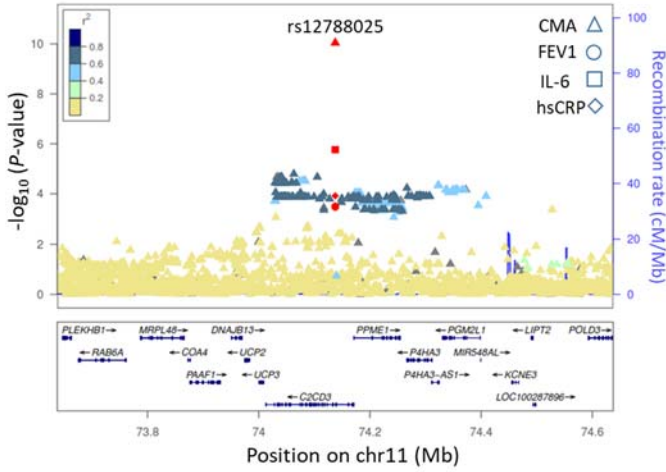

(M8) Men FVC\_IL6\_hsCRP: rs12788025

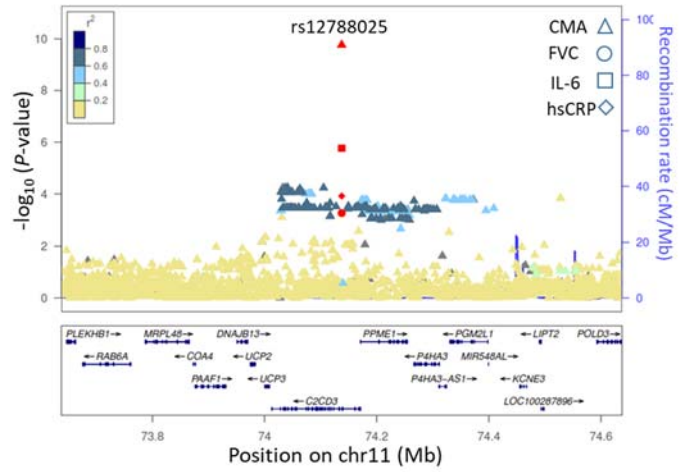

(M9) Men FVC\_IL-6\_hsCRP: rs58387290

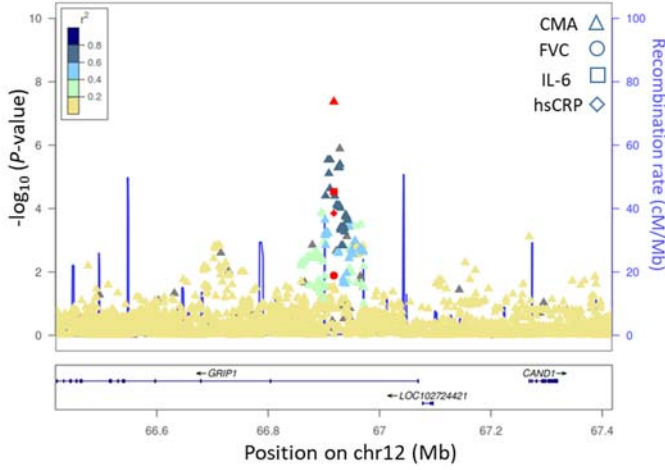

(M10) Men FEV1\_IL6\_hsCRP: rs78382897

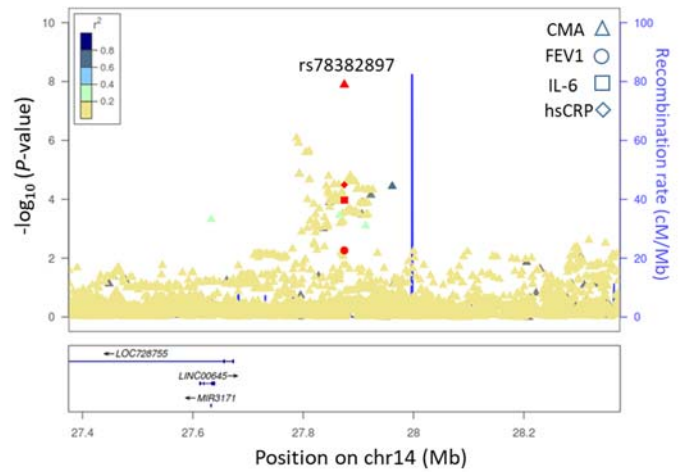

(M11) Men FEV1\_IL6\_hsCRP: rs202046252

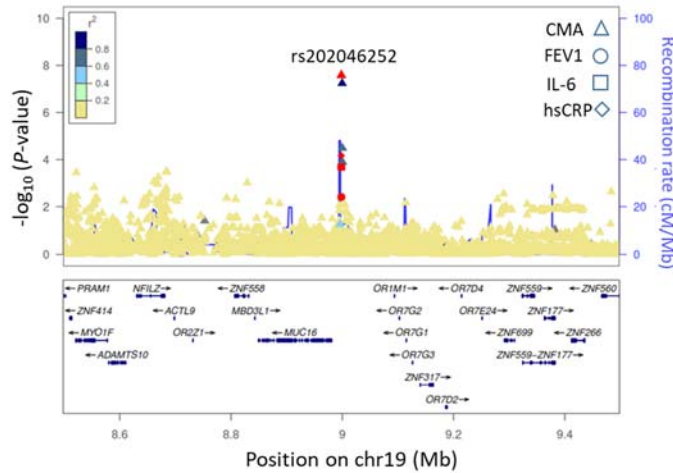

(M12) Men FVC\_IL6\_hsCRP: rs202046252

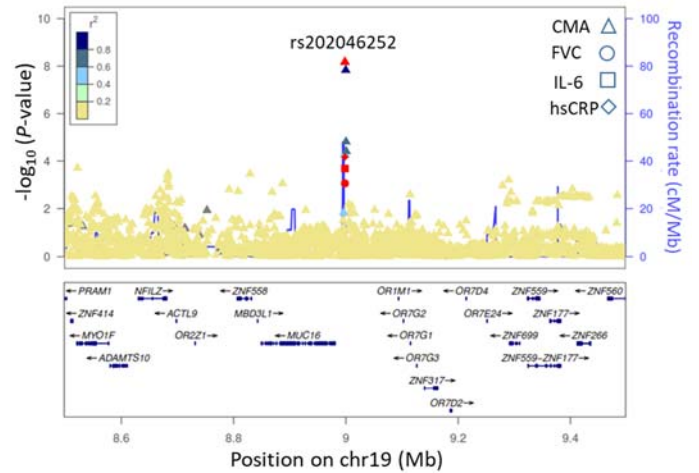

(W1) Women FEV1\_IL-6\_hsCRP: rs148184572

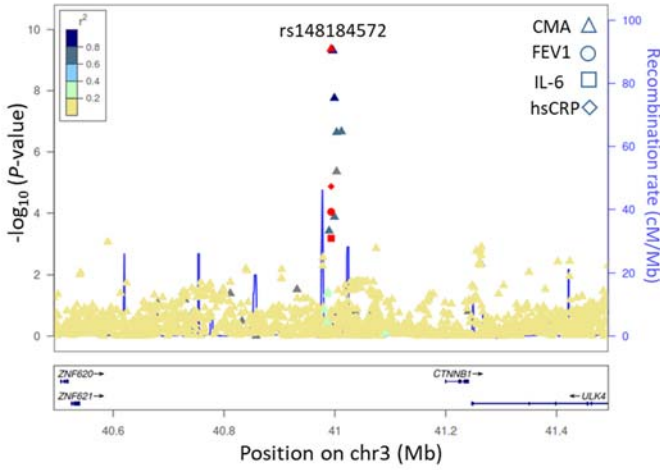

(W2) Women FVC\_IL-6\_hsCRP: rs148184572

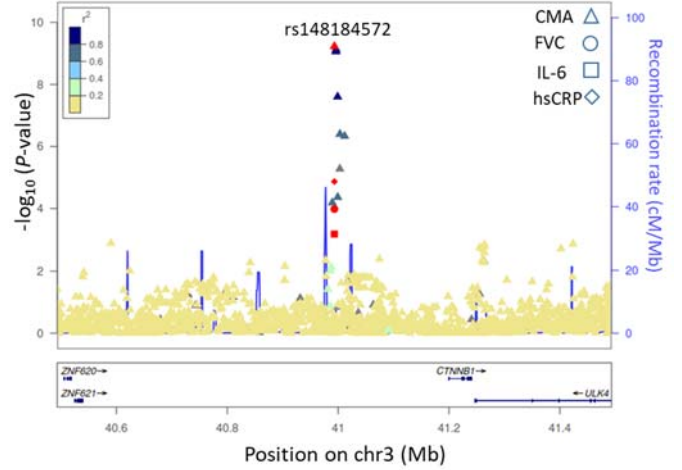

(W3) Women FEV1\_IL-6\_hsCRP: rs1426949

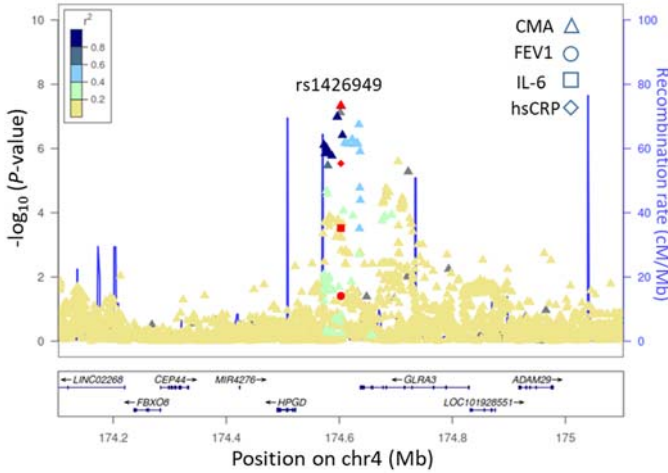

(W4) Women FVC\_IL-6\_hsCRP: rs11734163

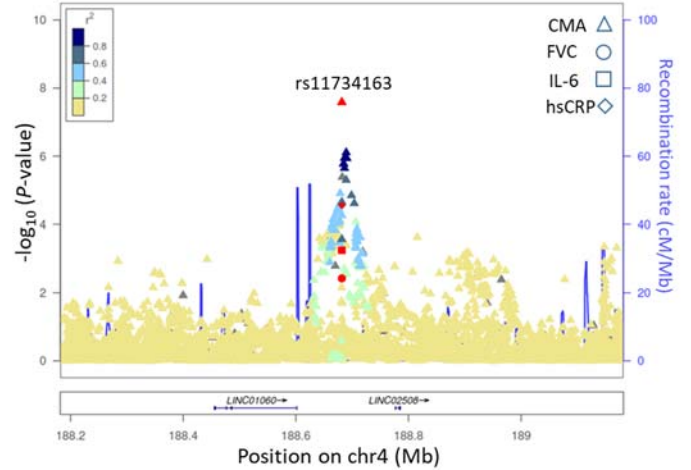

(W5) Women FEV1\_IL-6\_hsCRP: rs149824870

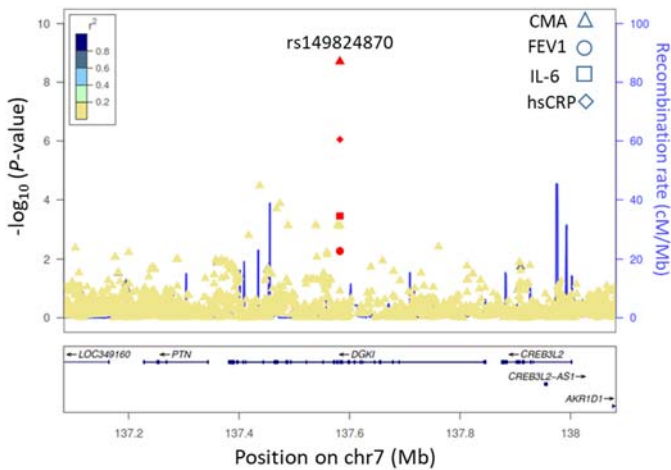

(W6) Women FVC\_IL-6\_hsCRP: rs149824870

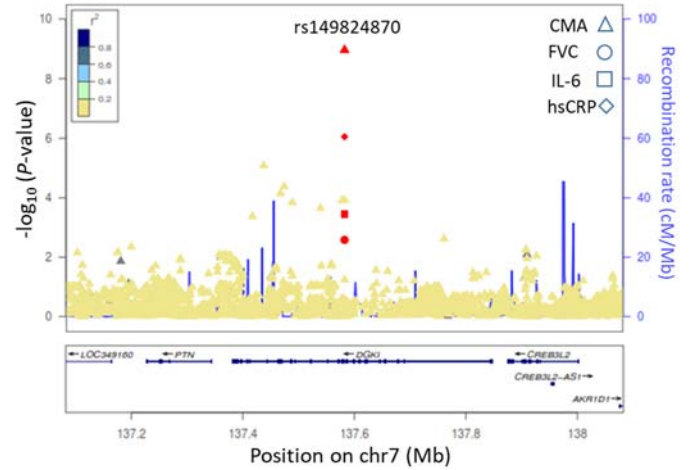



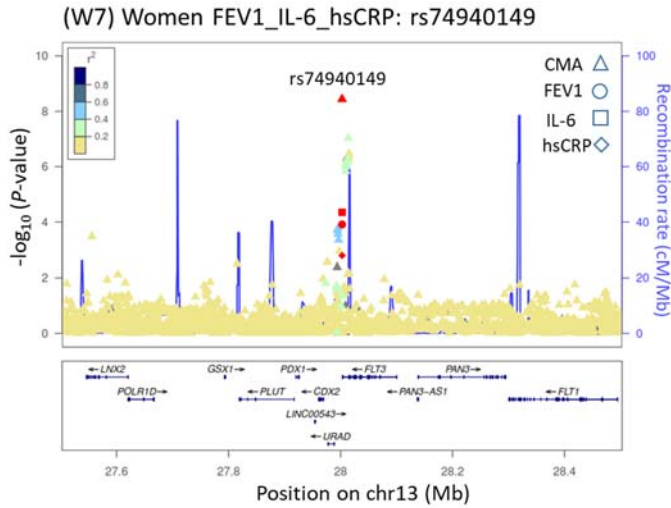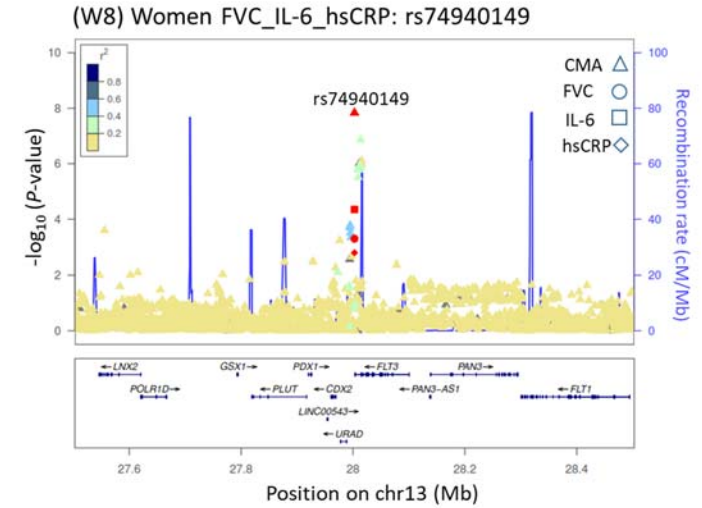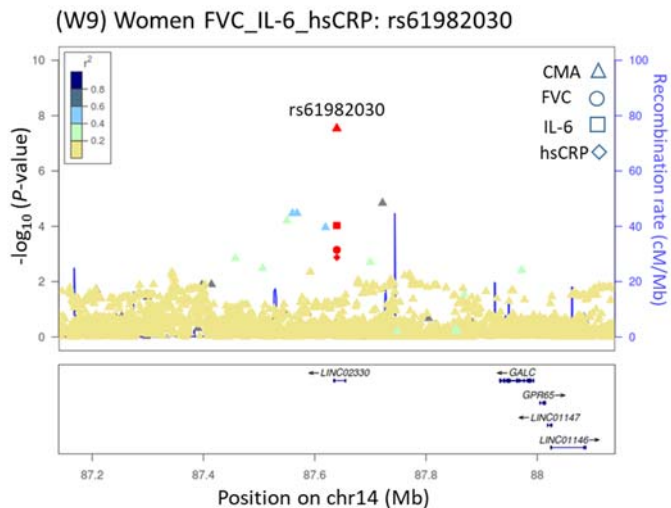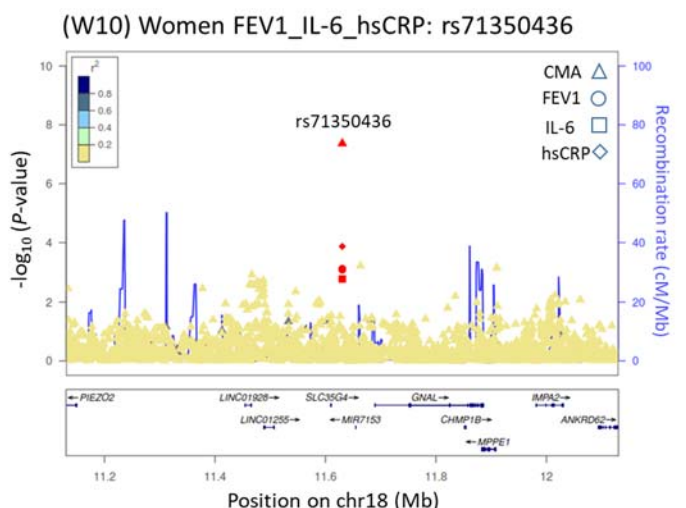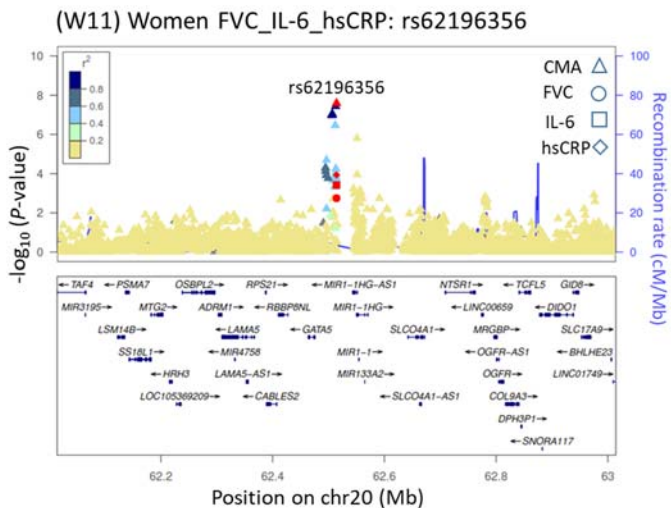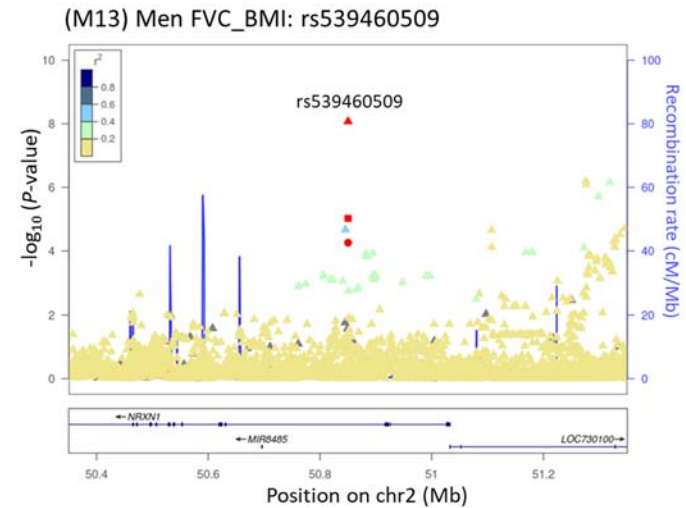

(M14) Men FVC\_BMI: rs28704520

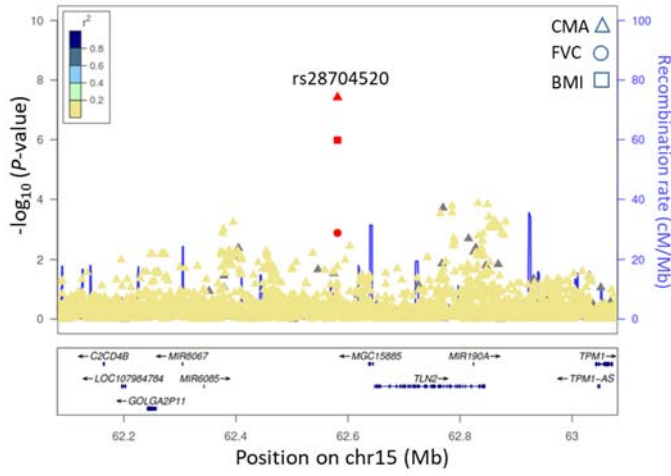

(W12) Women FEV1\_Grip strength: rs80148245

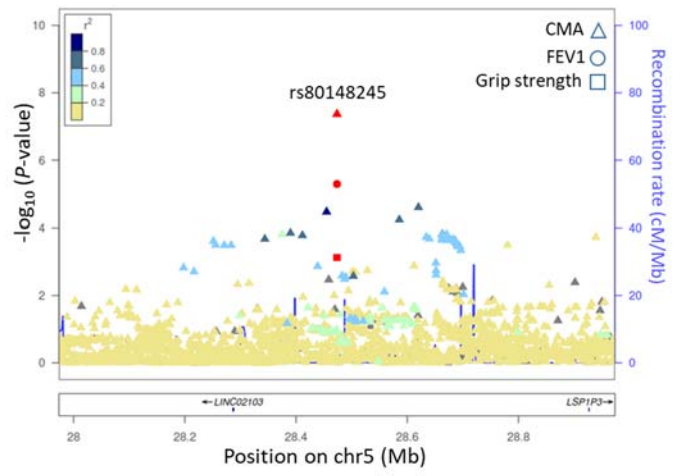

(W13) Women FVC\_Grip strength: rs80148245

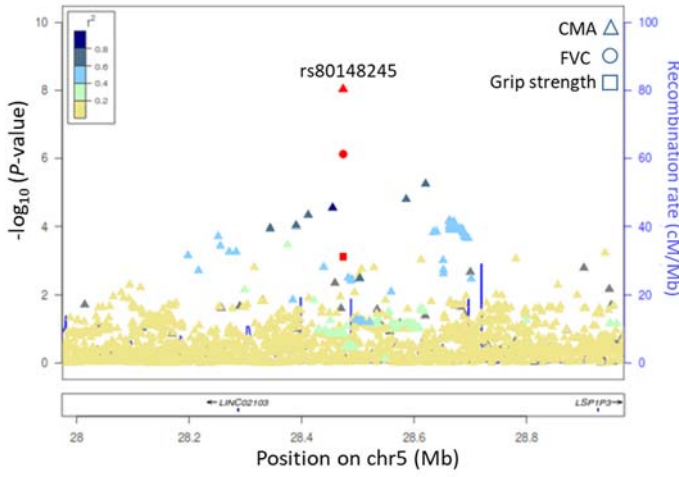

(W14) Women FVC\_Grip strength: rs117500377

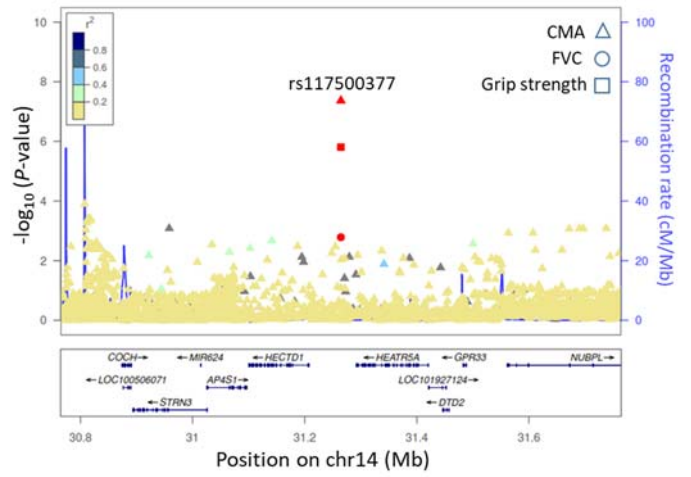

(W15) Women FVC\_HbA1c: rs693381

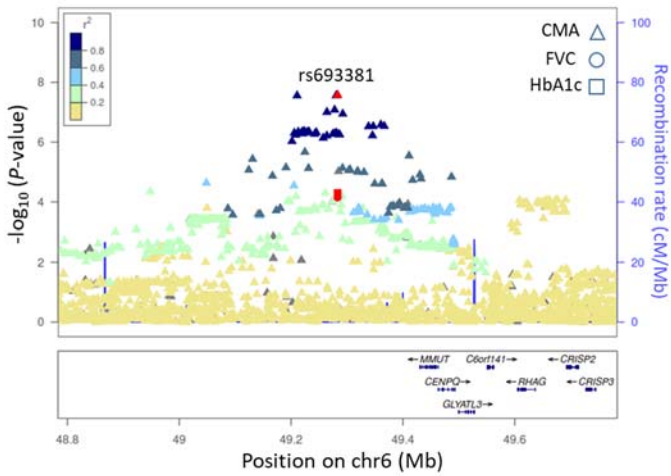

## Supplementary Figure 6. GWAS4D regulatory features of rs77980484 (8q24.12) on T-cells from peripheral blood

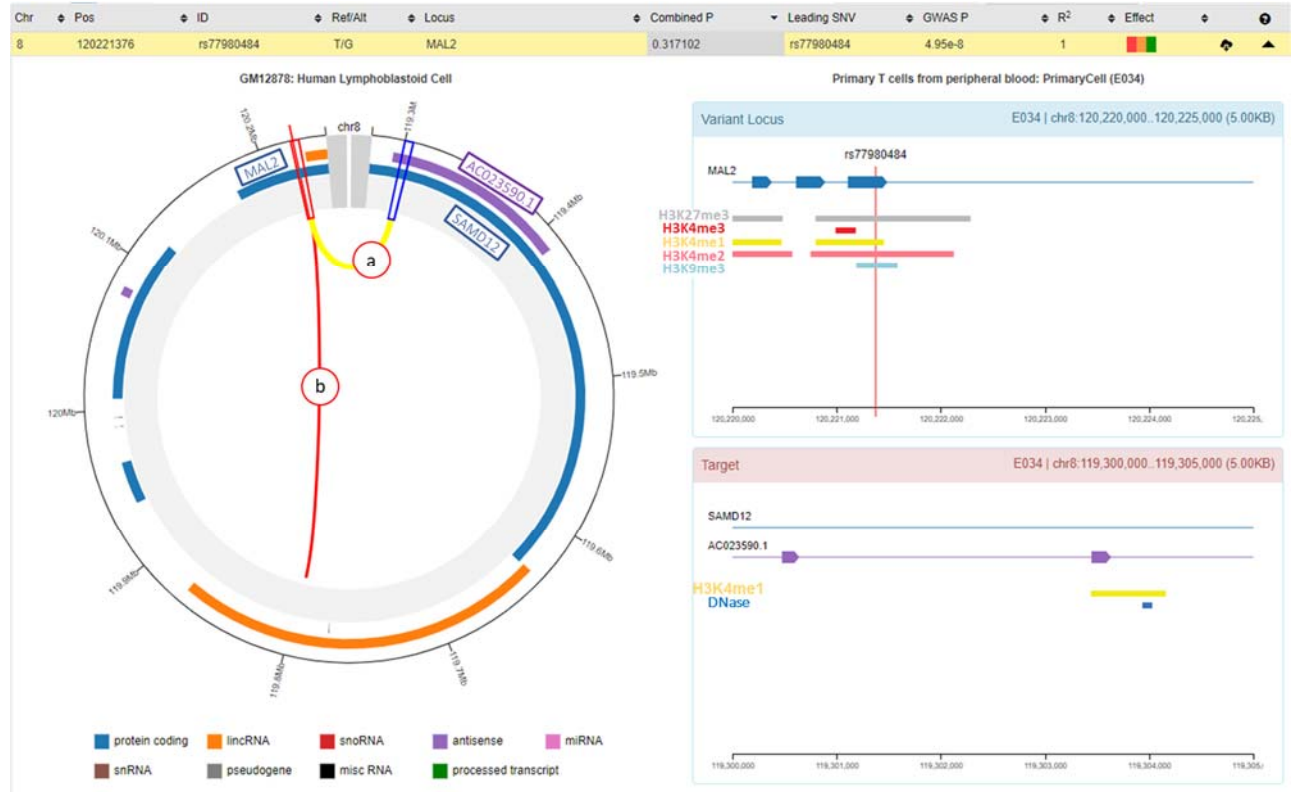

Notes: Chr = chromosome; Pos = Position (GRCh37, hg19); ID = prioritized regulatory variant; Ref/Alt = Reference and alternative alleles; Combined  $p$  = Combined regulatory probability; Leading SNP = The most significant SNP; GWAS  $p$  = correlated meta-analysis  $p$ -value;  $r^2$  = square correlation coefficient between ID SNP and leading SNP (see Supplementary Table 11). The prioritized SNP rs77980484, residing on the *MAL* locus, indicated regulatory features on primary T-cells from peripheral blood. The uniform processes of Hi-C data at 5kb resolution are represented at spatiotemporal level (left graphic). Significant Hi-C interactions (internal lines) were detected between *MAL* intronic- rs77980484 with (a) *SAMD12* / *AC023590.1* (1.69) and (b) lincRNA *SAMD12-AS1* (1.60). rs77980484 is located in the histone acetyltransferase activity (H3) regions. *SAMD12* is located in H3 regions and DNase hypersensitivity site (for "a", right-bottom graphic).



## Supplementary Figure 7. GWAS4D regulatory features of rs11079574 (17q23-q24.1) on T-cells from peripheral blood

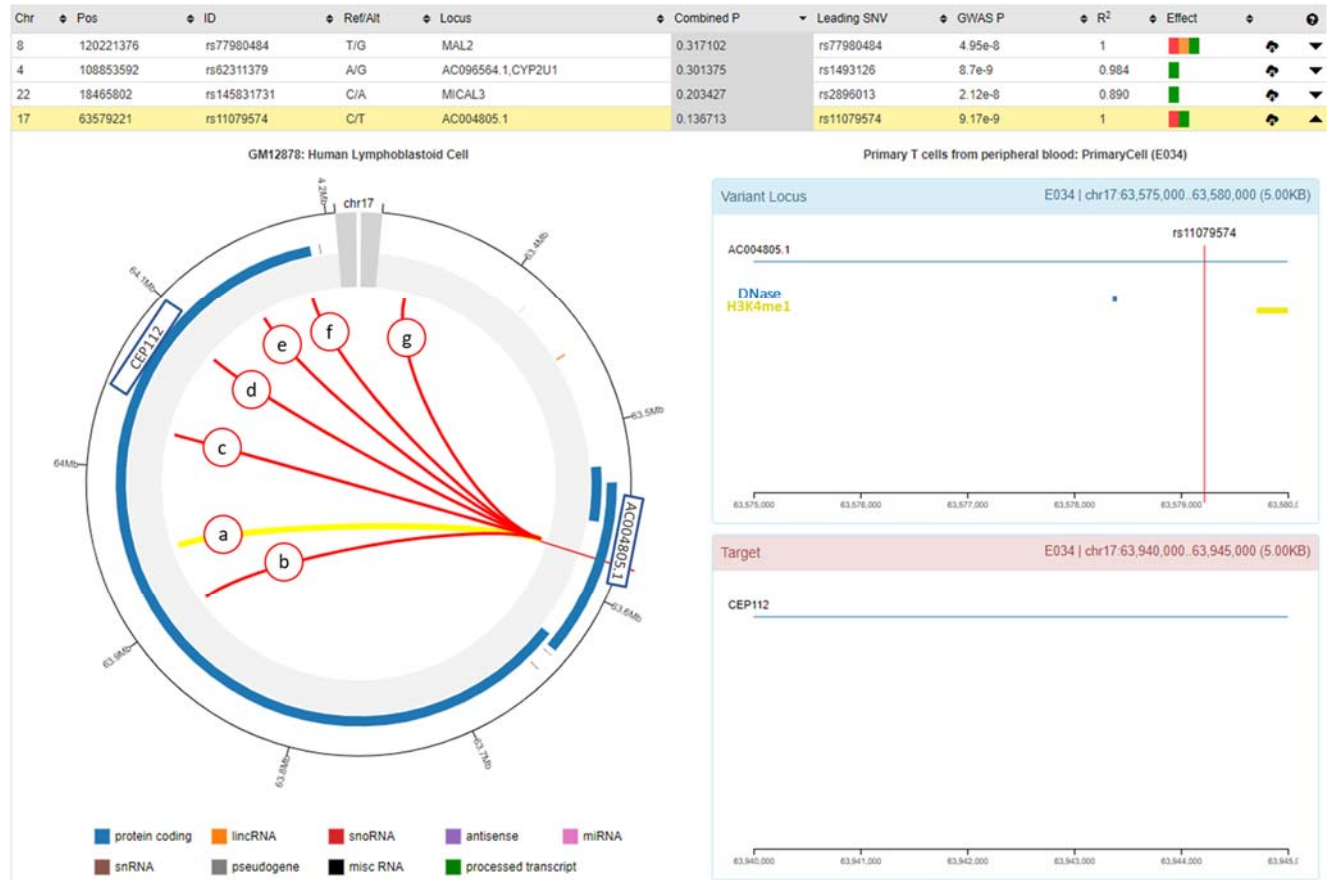

Notes: Chr = chromosome; Pos = Position (GRCh37, hg19); ID = prioritized regulatory variant; Ref/Alt = Reference and alternative alleles; Combined  $p$  = Combined regulatory probability; Leading SNP = The most significant SNP; GWAS  $p$  = correlated meta-analysis  $p$ -value;  $r^2$  = square correlation coefficient between ID SNP and leading SNP (see [Supplementary Table 11](#)). The prioritized SNP rs11079574, residing on *AC004805* gene, indicated regulatory features on primary T-cells from peripheral blood. The uniform processes of Hi-C data at 5kb resolution are represented at spatiotemporal level (left graphic). Significant Hi-C interactions (internal lines) were detected between rs11079574 with (a-f) *CEP112* (1.32 - 1.56) and (g) 63,34 Mb (1.35). rs11079574 is located in the histone acetyltransferase activity (H3) region and DNase hypersensitivity site.

## Supplementary Figure 8. GWAS4D regulatory features of rs62196354 (20q13.33) on fetal lung cell lines

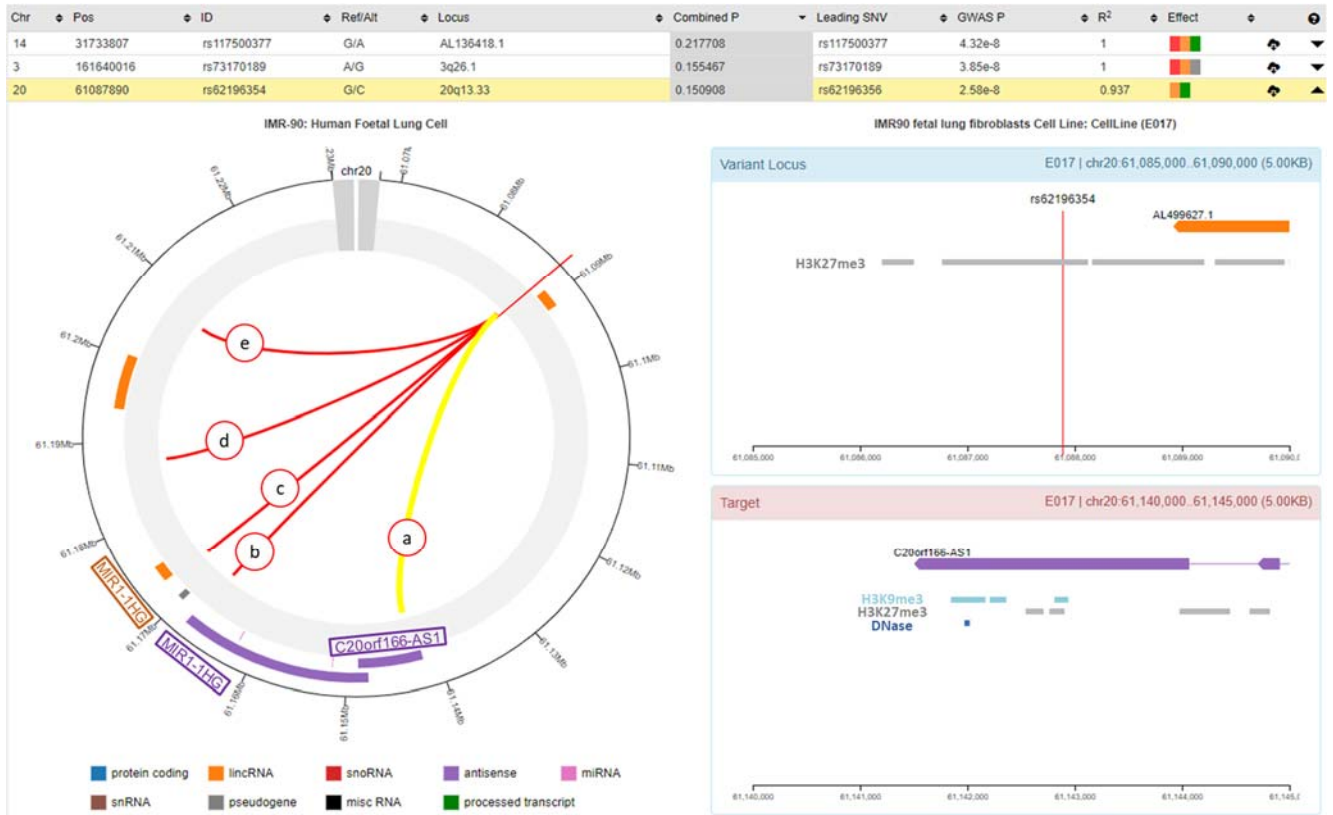

Notes: Chr = chromosome; Pos = Position (GRCh37, hg19); ID = prioritized regulatory variant; Ref/Alt = Reference and alternative alleles; Combined  $p$  = Combined regulatory probability; Leading SNP = The most significant SNP; GWAS  $p$  = correlated meta-analysis  $p$ -value;  $r^2$  = square correlation coefficient between ID SNP and leading SNP (see [Supplementary Table 11](#)). The prioritized rs62196354 indicated regulatory features on fetal lung cell lines. The uniform processes of Hi-C data at 5kb resolution are represented at spatiotemporal level (left graphic). Significant HI-C interactions (a-e internal lines) were detected between rs62196354 with (a) *C20orf166-AS1* (2.09), (b) *MIR1-1HG* (1.97), (c) *RPL7P3 / BX640514.1* (1.53), (d) 61.19 Mb (1.47), (e) 61.2 Mb (1.68). rs62196354 is located in histone acetyltransferase activity towards (H3) region (right-top graphic). *C20orf166-AS1* is located in H3 regions and in DNase hypersensitivity site (right-bottom graphic).

## Supplementary Figure 9. GWAS4D regulatory features of rs117500377 (14q12) on adipose mesenchymal stem cells

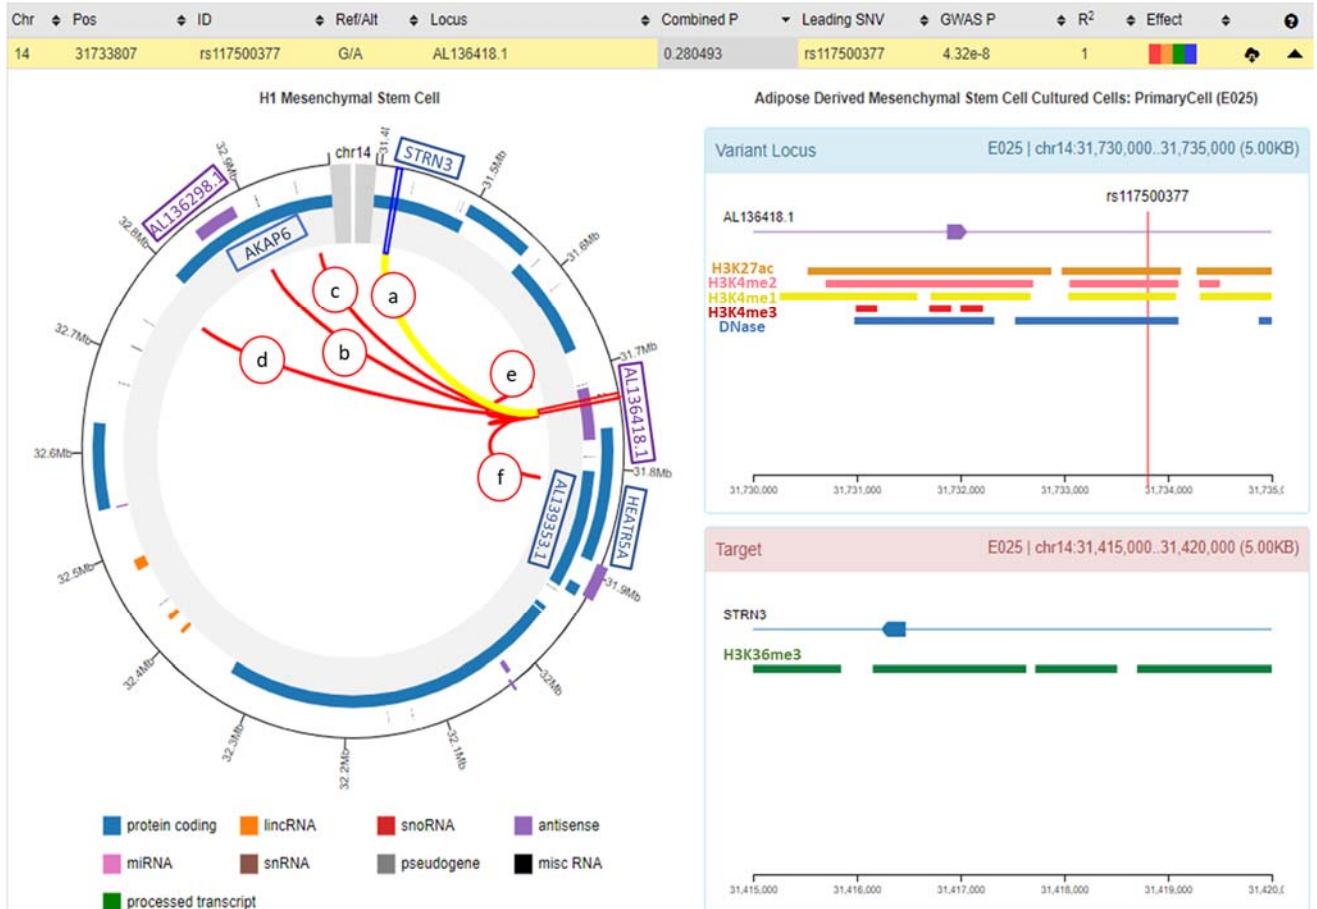

Notes: Chr = chromosome; Pos = Position (GRCh37, hg19); ID = prioritized regulatory variant; Ref/Alt = Reference and alternative alleles; Combined  $p$  = Combined regulatory probability; Leading SNP = The most significant SNP; GWAS  $p$  = correlated meta-analysis  $p$ -value;  $r^2$  = square correlation coefficient between ID SNP and leading SNP (see [Supplementary Table 11](#)). The prioritized rs117500377, residing on antisense *AL136418.1*, indicated regulatory features on adipose derived mesenchymal stem cell. The uniform processes of Hi-C data at 5kb resolution are represented at spatiotemporal level (left graphic). Significant HI-C interactions (a-f internal lines) were detected between rs117500377 with (a) *STRN3* (score=1.99), (b, c) 32.95 Mb (scores=1.84-1.98), (d) 32.77 Mb (score=1.64), (e) 31.70 Mb (score=1.87), and (f) *HEATR5A / AL139353.1* (score=1.25). rs117500377 is located in histone acetyltransferase activity towards (H3) regions, and in DNase hypersensitivity site (right-top graphic). *STRN3* is located in H3 region (right-bottom graphic).

## Supplementary Figure 10. GWAS4D regulatory features of rs117500377 (14q12) on liver

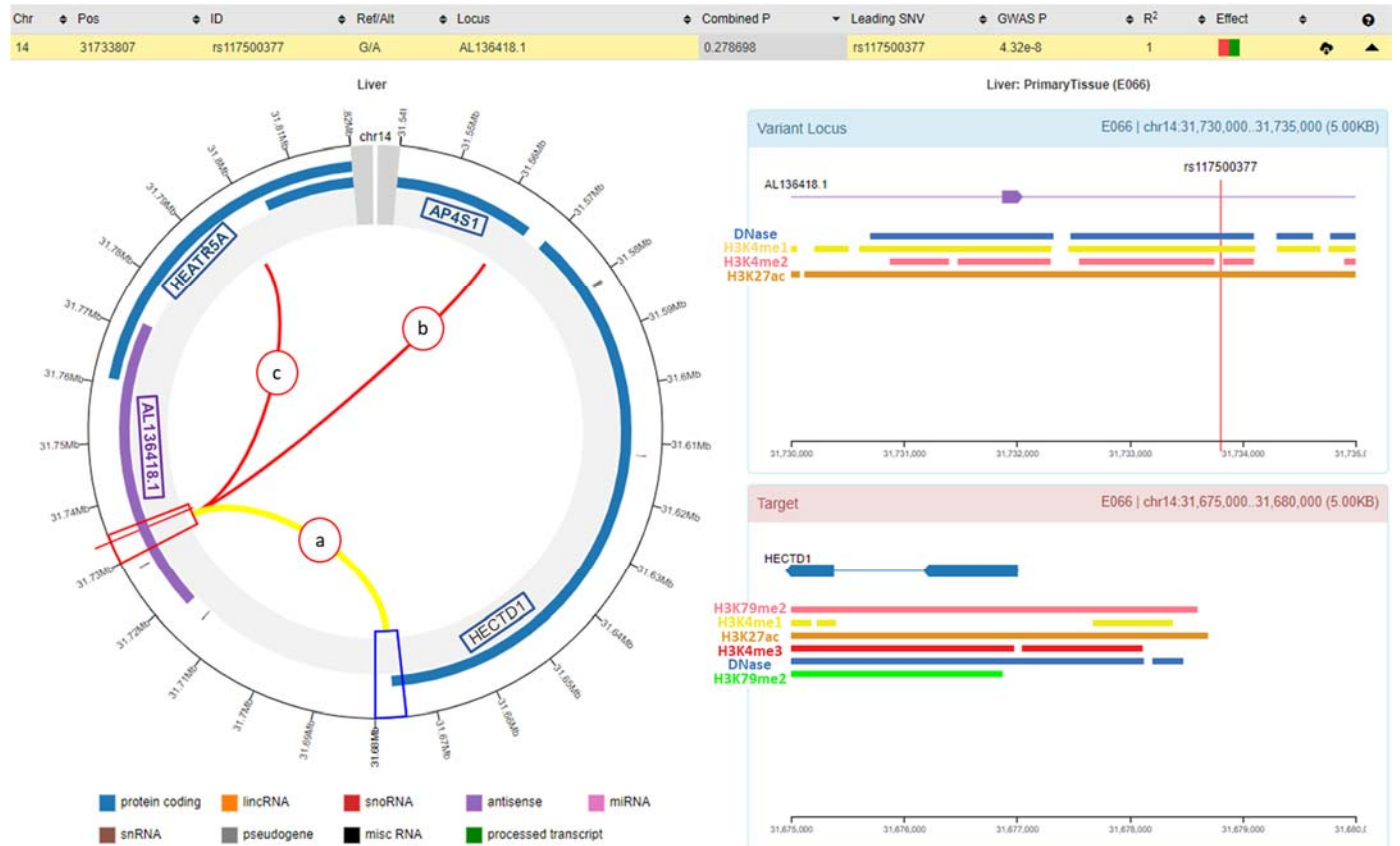

Notes: Chr = chromosome; Pos = Position (GRCh37, hg19); ID = prioritized regulatory variant; Ref/Alt = Reference and alternative alleles; Combined  $p$  = Combined regulatory probability; Leading SNP = The most significant SNP; GWAS  $p$  = correlated meta-analysis  $p$ -value;  $r^2$  = square correlation coefficient between ID SNP and leading SNP (see Supplementary Table 11). The prioritized rs117500377, residing on antisense *AL136418.1*, indicated regulatory features on liver. Significant HI-C interactions (a-c internal lines) were detected between rs117500377 with (a) *HECTD1* (2.05), (b) *AKAP6* (1.71), (c) *HEATR5A* (1.52). rs117500377 is located in histone acetyltransferase activity towards (H3) regions and in DNase hypersensitivity site (right-top graphic). *HECTD1* is located in H3 regions and in DNase hypersensitivity site (right-bottom graphic).

## Supplementary Figure 11. GWAS4D regulatory features of rs62196354 (20q13.33) on hepatocellular carcinoma cell line

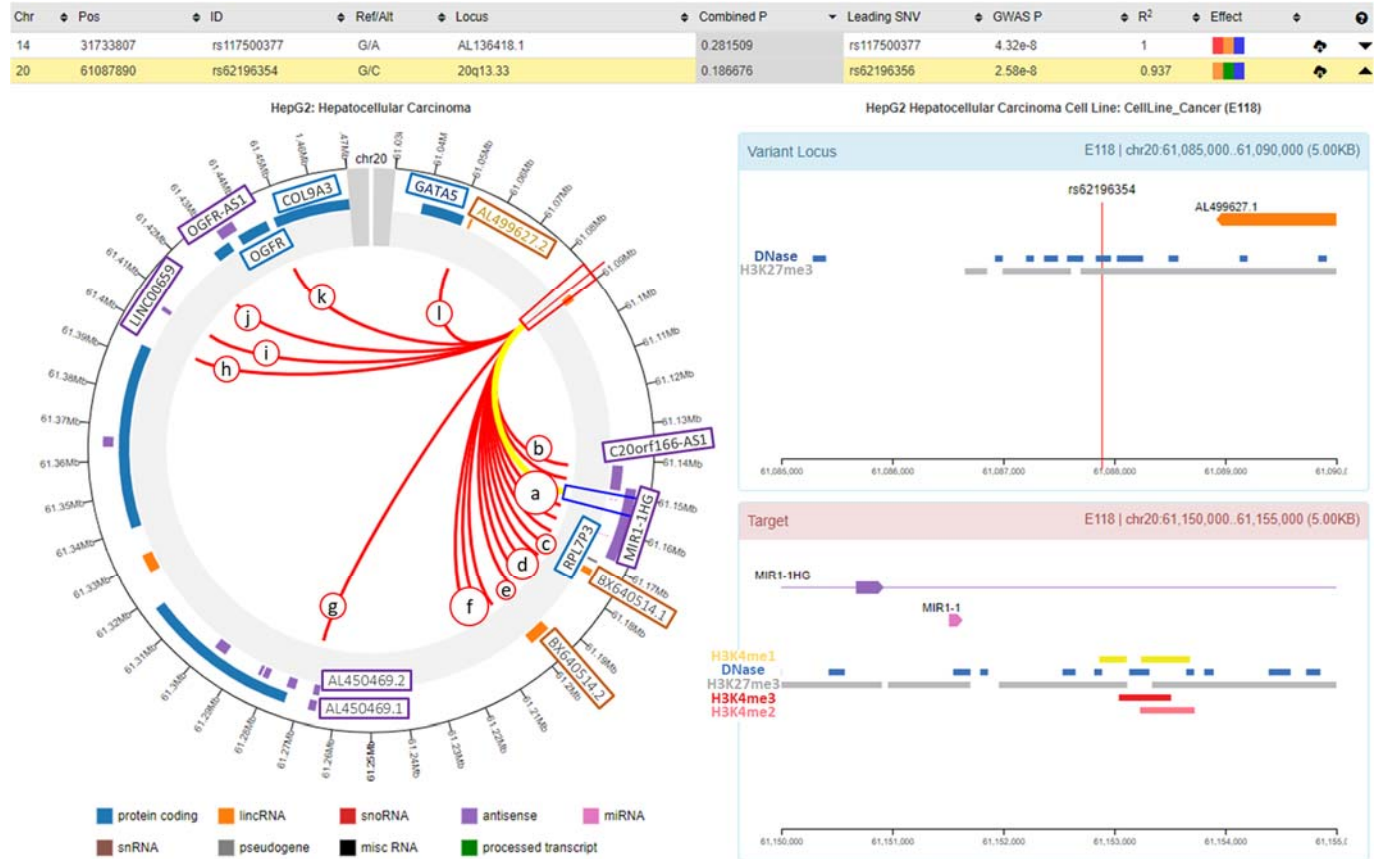

Notes: Chr = chromosome; Pos = Position (GRCh37, hg19); ID = prioritized regulatory variant; Ref/Alt = Reference and alternative alleles; Combined  $p$  = Combined regulatory probability; Leading SNP = The most significant SNP; GWAS  $p$  = correlated meta-analysis  $p$ -value;  $r^2$  = square correlation coefficient between ID SNP and leading SNP (see Supplementary Table 11). The prioritized rs62196354 indicated regulatory features on hepatocellular carcinoma cell line. The uniform processes of Hi-C data at 5kb resolution are represented at spatiotemporal level (left graphic). Significant Hi-C interactions (a-f internal lines) were detected between rs62196354 (a) *MIR1-1HG* (1.40-2.24), (b) *C20orf166-AS1* (1.81), (c) *BX640514.1/RPL7P3* (1.46), (d) 61.18 Mb (1.57-1.77), (e) *BX640514.2* (1.30), (f) 61.21 Mb (1.56 – 2.03), (g) *AL450469.1/AL450469.2* (1.59), (h) 61.40 Mb (1.37), (i) *LINC00659* (1.79), (j) 61.42 Mb (1.40), (k) *OGFR/COL9A3* (1.25), (l) *GATA5/AL499627.2* (1.37). rs62196354 is located in histone acetyltransferase activity towards (H3) region and in DNase hypersensitivity site (right-top graphic). *MIR1-1HG* is located in H3 regions and in DNase hypersensitivity site (right-bottom graphic).
